# Supplementary material for: Dinuclear indium and thallium diyls: biscarbenoids or metal cluster?
Source: Royal Society of Chemistry journal article supplement (doi:10.1039/c6cc09488k), 2016-12-24
Supplement: c6cc09488k1.pdf [file c6cc09488k1.pdf]

# Dinuclear Indium and Thallium Diyls: Biscarbenoids or Metal Cluster?

Marcella E. Desat, Stefanie Gärtner and Robert Kretschmer\*

## Content

|                                                       |    |
|-------------------------------------------------------|----|
| 1. Variable temperature $^1\text{H}$ NMR spectra..... | 2  |
| 2. UV-VIS experiments.....                            | 4  |
| 3. Natural bond orbitals .....                        | 5  |
| 4. Experimental Details.....                          | 6  |
| 5. Crystallographic Details .....                     | 8  |
| 6. Computational Details.....                         | 10 |
| 7. References .....                                   | 42 |

## 1. Variable temperature $^1\text{H}$ NMR spectra

a)

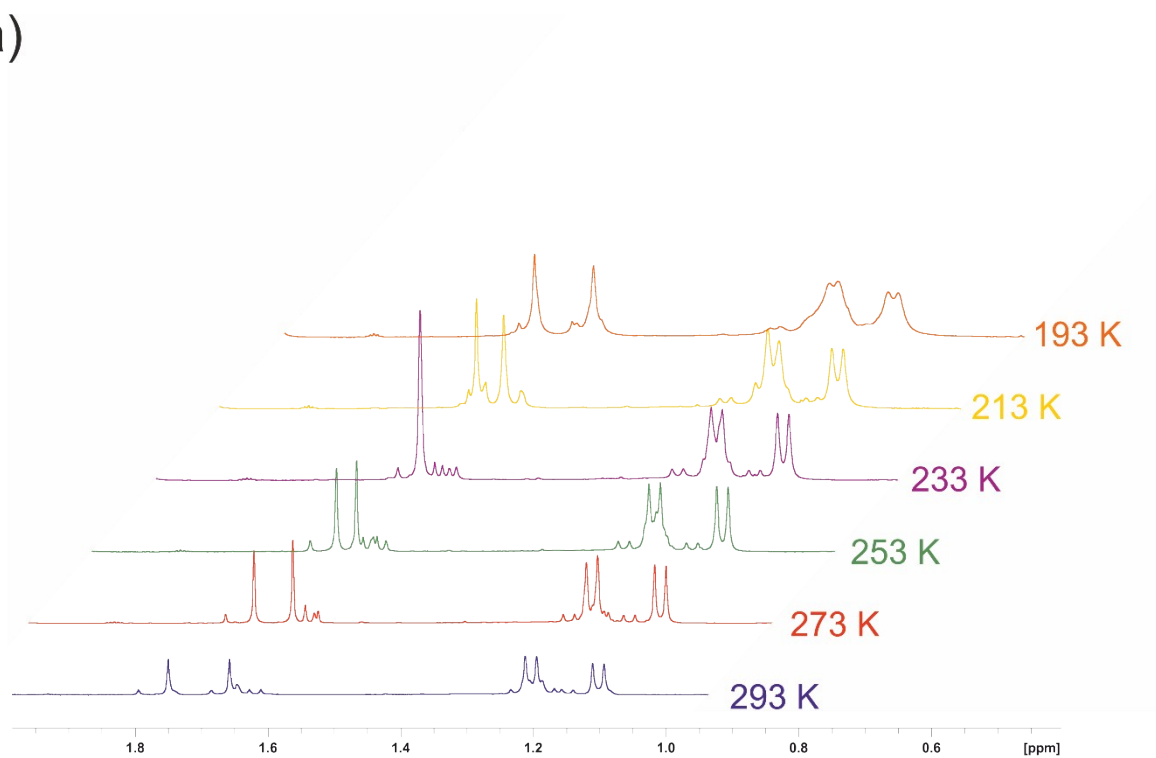

b)

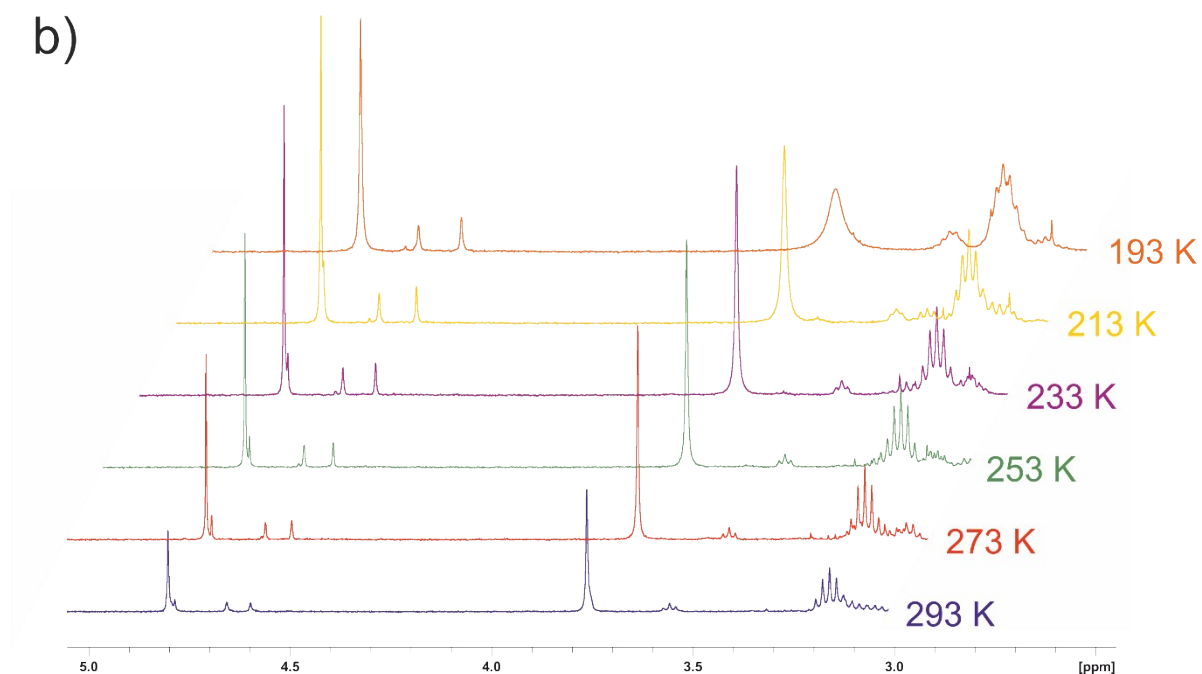

**Figure S1** Excerpts (a) 0.9 – 1.9 ppm and b) 3.0 – 5.0 ppm) of the  $^1\text{H}$  NMR spectra of a solution of **2** in  $\text{toluene-d}_8$  at different temperatures.

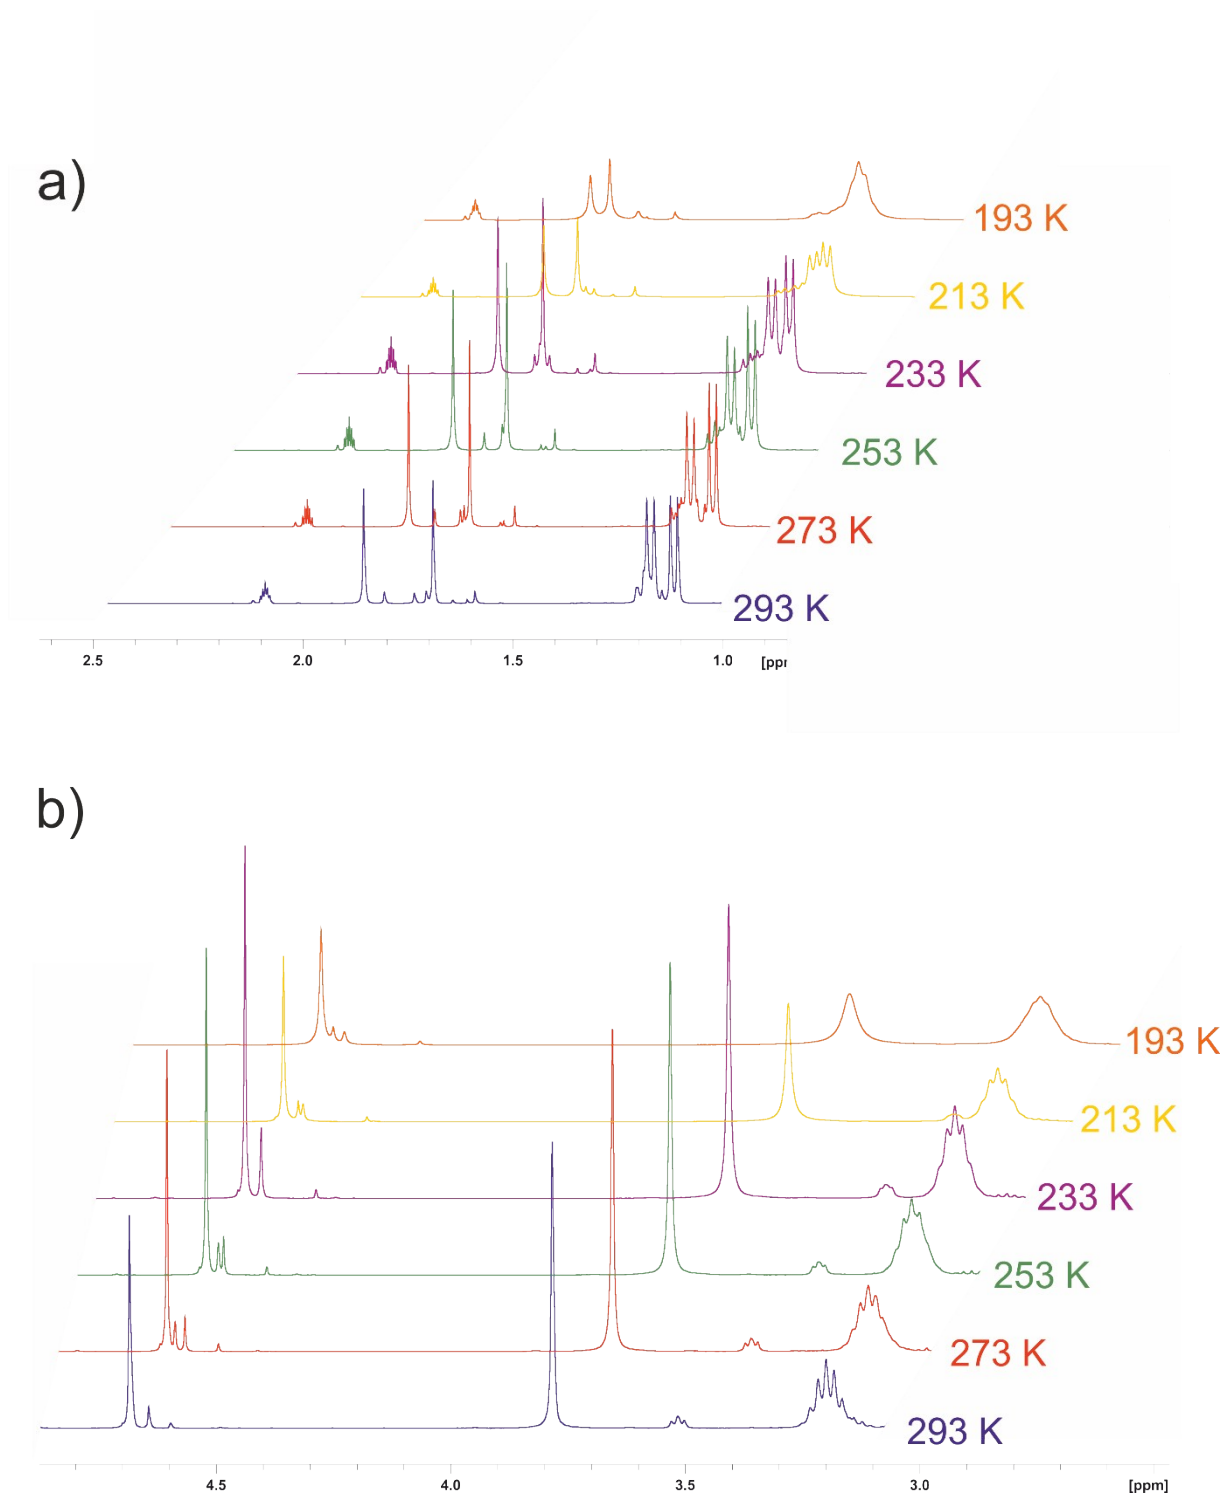

**Figure S2** Excerpts (a) 1.0 – 2.5 ppm and b) 3.0 – 4.9 ppm) of the  $^1\text{H}$  NMR spectra of a solution of **2** in toluene- $d_8$  at different temperatures.

## 2. UV-VIS experiments

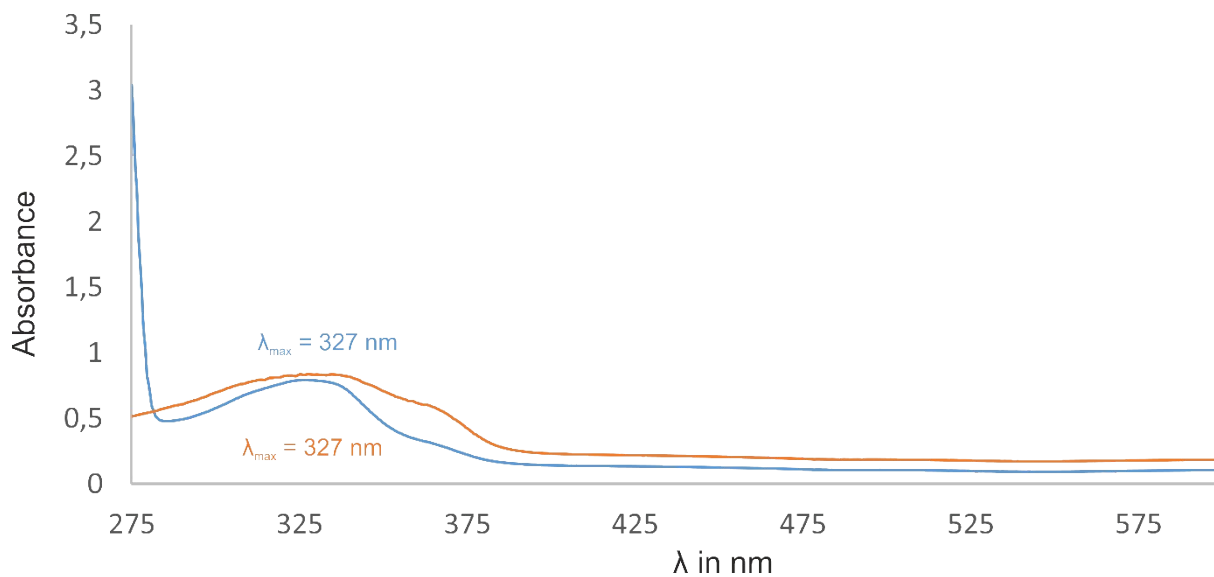

**Figure S3** UV-VIS spectra of **2** as a solution in benzene (blue line) and in the solid state (orange line).

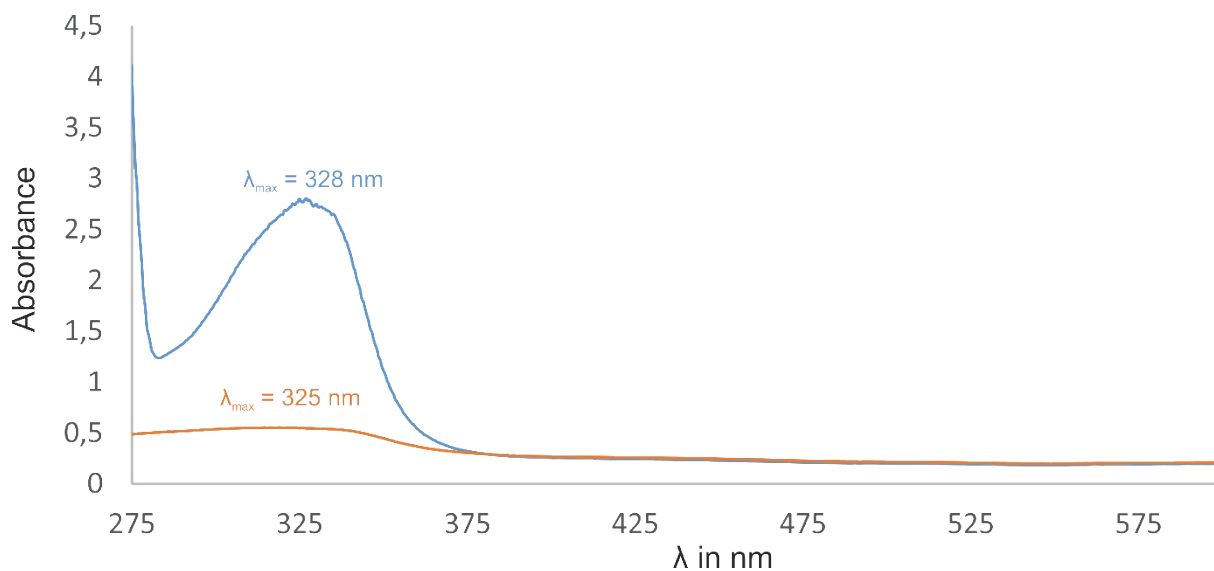

**Figure S4** UV-VIS spectra of **3** as a solution in benzene (blue line) and in the solid state (orange line).

### 3. Natural bond orbitals

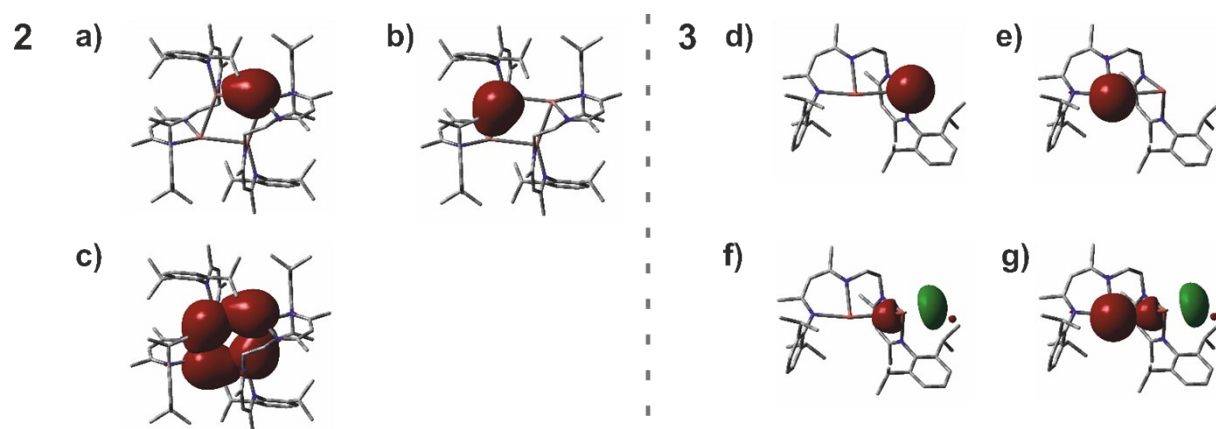

**Figure S5** Calculated (B3LYP/LANL2DZ) natural bond orbitals: a) and b) show the NBOs of the respective inter- and intramolecular In-In bond and c) a combination of all four NBOs within **2**. The mostly s-type donor NBOs of **3** are shown in d) and e), while the acceptor NBO and the donor-acceptor interaction are shown in f) and g), respectively.

## 4. Experimental Details

**General Considerations.** All preparations were performed under an inert atmosphere of dinitrogen by means of both standard Schlenk line or glovebox techniques (MBraun). Traces of oxygen and moisture were successively removed from the inert gas by passing it over a BASF R 3-11 (CuO/MgSiO<sub>3</sub>) catalyst, through concentrated sulfuric acid, over coarsely granulated silica gel, and finally P<sub>4</sub>O<sub>10</sub>. Toluene and THF were used as p.a. grade and distilled from Na/benzophenone prior to use. C<sub>6</sub>D<sub>6</sub> was dried by distillation from potassium. Indium(I) iodide was purchased from Onyxmet, while thallium(I) iodide and potassium bis(trimethylsilyl)amide (KHMDS) were purchased from Sigma Aldrich. These starting materials were used as delivered. The ligand precursor **1** was prepared according to a literature procedure.<sup>S1</sup>

**Characterization.** The NMR-spectra were recorded on a BrukerAvance 400 spectrometer (<sup>1</sup>H: 400.13 MHz, <sup>13</sup>C: 101 MHz, T = 300 K) with  $\delta$  (given in ppm) referenced to external trimethylsilane. <sup>1</sup>H and <sup>13</sup>C NMR spectra were calibrated using the solvent residual peak ( $\delta$  <sup>1</sup>H (C<sub>6</sub>D<sub>5</sub>H) = 7.20) and the solvent peak ( $\delta$  <sup>13</sup>C (C<sub>6</sub>D<sub>6</sub>) = 128.0), respectively. The coupling constants *J* are given in Hertz [Hz]. Elemental analysis were performed on a Vario micro cube (Elementar Analysensysteme GmbH). The (qualitative) UV-VIS spectra were recorded on a Varian Cary 50 spectrometer in the Dual Beam mode and with a scan rate of 60.0 nm/min. The solution spectra were obtained from benzene solutions of **2** and **3**, respectively, using a Schlenk quartz cuvette. For the solid state spectra, benzene solutions of **2** and **3**, respectively, were transferred to a Schlenk quartz cuvette. By evaporation of the solvent, a thin layer of the solid compounds remained on the walls of the cuvette and was measured immediately.

**2:** THF (20 mL) was added to a mixture of InI (0.97 g, 4.00 mmol), KHMDS (0.80 g, 4.00 mmol), and **1** (1.09 g, 2.00 mmol) at -78 °C. Warming to room temperature and stirring in the absence of light for 22 h produced a dark brown suspension. The volatiles were removed and the grey residue was extracted with toluene (20 mL). Filtration and concentration of the filtrate to about one third gave rise to **2** as clear light yellow crystals suitable for an X-ray diffraction analysis. (371 mg, 34 %); Anal. calc. (found) for [C<sub>36</sub>H<sub>52</sub>N<sub>4</sub>In<sub>2</sub>]<sub>2</sub>·C<sub>7</sub>H<sub>8</sub>: C 58.10 (57.99); H 6.91 (6.96); N 6.86 (6.74); <sup>1</sup>H-NMR: (400 MHz, C<sub>6</sub>D<sub>6</sub>):  $\delta$  = 1.12 [d, 12H, <sup>3</sup>J<sub>HH</sub> = 6.9 Hz, CHMe<sub>2</sub>], 1.23 [d, 12H, <sup>3</sup>J<sub>HH</sub> = 6.9 Hz, CHMe<sub>2</sub>], 1.69 [s, 6H, CMe], 1.74 [s, 6H, CMe], 3.21 [sept, 4H, <sup>3</sup>J<sub>HH</sub> = 6.9

Hz,  $\text{CHMe}_2$ ], 3.76 [s, 4H,  $\text{CH}_2$ ], 4.84 [s, 2H,  $\beta\text{-CH}$ ], 7.12 [s, 6H,  $\text{ArH}$ ];  $^1\text{H-NMR}$ : (400 MHz,  $\text{ToI-d}_8$ ):  $\delta$  = 1.10 [d, 12H,  $^3J_{\text{HH}} = 6.8$  Hz,  $\text{CHMe}_2$ ], 1.20 [d, 12H,  $^3J_{\text{HH}} = 6.8$  Hz,  $\text{CHMe}_2$ ], 1.66 [s, 6H,  $\text{CMe}$ ], 1.75 [s, 6H,  $\text{CMe}$ ], 3.16 [sept, 4H,  $^3J_{\text{HH}} = 6.8$  Hz,  $\text{CHMe}_2$ ], 3.76 [s, 4H,  $\text{CH}_2$ ], 4.80 [s, 2H,  $\text{CH}$ ], 7.08 [s, 6H,  $\text{ArH}$ ];  $^{13}\text{C}\{^1\text{H}\}\text{-NMR}$ : (101 MHz,  $\text{C}_6\text{D}_6$ ):  $\delta$  = 22.4 [ $\text{CMe}$ ], 23.9 [ $\text{CHMe}_2$ ], 24.60 [ $\text{CMe}$ ], 26.1 [ $\text{CHMe}_2$ ], 28.2 [ $\text{CHMe}_2$ ], 52.8 [ $\text{CH}_2$ ], 99.0 [ $\beta\text{-CH}$ ], 123.9 [ $m\text{-C(Dipp)}$ ], 125.6 [ $p\text{-C(Dipp)}$ ], 142.5 [ $o\text{-C(Dipp)}$ ], 145.5 [ $i\text{-C(Dipp)}$ ], 163.6 [CN], 165.6 [CN].

**3** was synthesized by a procedure directly analogous to **2**, employing **TII** (0.80 g, 4.00 mmol), **KHMDS** (1.33 g, 4.00 mmol), and **1** (1.09 g, 2.00 mmol) to yield **3** as clear light yellow crystals suitable for an X-ray diffraction analysis. (2.98 g, 79 %); Anal. calc. (found) for [ $\text{C}_{36}\text{H}_{52}\text{N}_4\text{Ti}_2 \cdot 0.4 \text{C}_7\text{H}_8$ ]: C 47.24 (47.39); H 5.64 (5.42); N 5.68 (5.96);  $^1\text{H-NMR}$ : (400 MHz,  $\text{C}_6\text{D}_6$ ):  $\delta$  = 1.13 [d, 12H,  $^3J_{\text{HH}} = 7.0$  Hz,  $\text{CHMe}_2$ ], 1.19 [d, 12H,  $^3J_{\text{HH}} = 7.0$  Hz,  $\text{CHMe}_2$ ], 1.73 [s, 6H,  $\text{CMe}$ ], 1.87 [s, 6H,  $\text{CMe}$ ], 3.22 [br, 4H,  $\text{CHMe}_2$ ], 3.78 [s, 4H,  $\text{CH}_2$ ], 4.74 [s, 2H,  $\beta\text{-CH}$ ], 7.06-7.10 [m, 2H,  $\text{ArH}$ ], 7.11-7.15 [m, 2H,  $\text{ArH}$ ];  $^1\text{H-NMR}$ : (400 MHz,  $\text{ToI-d}_8$ ):  $\delta$  = 1.11 [d, 12H,  $^3J_{\text{HH}} = 6.9$  Hz,  $\text{CHMe}_2$ ], 1.17 [d, 12H,  $^3J_{\text{HH}} = 6.9$  Hz,  $\text{CHMe}_2$ ], 1.69 [s, 6H,  $\text{CMe}$ ], 1.86 [s, 6H,  $\text{CMe}$ ], 3.20 [sept, 4H,  $^3J_{\text{HH}} = 6.9$  Hz,  $\text{CHMe}_2$ ], 3.78 [s, 4H,  $\text{CH}_2$ ], 4.69 [s, 2H,  $\text{CH}$ ], 7.03 [d, 1H,  $^3J_{\text{HH}} = 2.5$  Hz,  $\text{ArH}$ ], 7.05 [s, 1H,  $\text{ArH}$ ], 7.08 [s, 2H,  $\text{ArH}$ ], 7.10 [s, 1H,  $\text{ArH}$ ], 7.12-7.15 [m, 1H,  $\text{ArH}$ ];  $^{13}\text{C}\{^1\text{H}\}\text{-NMR}$ : (101 MHz,  $\text{C}_6\text{D}_6$ ):  $\delta$  = 21.5 [ $\text{CMe}$ ], 23.2 [ $\text{CMe}$ ], 23.8 [ $\text{CHMe}_2$ ], 25.5 [ $\text{CHMe}_2$ ], 27.8 [ $\text{CHMe}_2$ ], 53.8 [ $\text{CH}_2$ ], 101.6 [ $\beta\text{-CH}$ ], 123.7 [ $m\text{-C(Dipp)}$ ], 124.7 [ $p\text{-C(Dipp)}$ ], 138.2 [ $o\text{-C(Dipp)}$ ], 141.7 [ $i\text{-C(Dipp)}$ ], 161.9 [CN], 164.4 [CN].

## 5. Crystallographic Details

The single crystal X-ray diffraction data were recorded on an Agilent Technologies SuperNova diffractometer with microfocus Cu K $\alpha$  radiation ( $\lambda = 1.54184 \text{ \AA}$ ). Empirical multi-scan<sup>S2</sup> and analytical absorption corrections<sup>S3</sup> were applied to the data. The structures were solved with SHELXT<sup>S4</sup> and least-square refinements on  $F^2$  were carried out with SHELXL.<sup>S5</sup> Maxima in the Fourier difference maps of **2** indicated the presence of a second species, which allowed for the refinement of a second In<sub>4</sub> ring (0.0781(7)) including bridging oxygen atoms according to a larger distance of the corresponding Indium atoms. In this compound, also unresolved residual electron density around a centre of inversion was present, which could be assigned a disordered solvent molecule of toluene. The disorder could not be resolved completely, therefore PLATON SQUEEZE<sup>S6</sup> was applied and the presence of a solvent accessible void including 46 electrons was confirmed, which we assign a not fully occupied toluene molecule. In the subsequent refinement a modified reflection file without the contribution of the solvent was used.

CCDC 1504564 (**3**) and 1504565 (**2**) contain the supplementary crystallographic data for this paper. These data can be obtained free of charge from the Cambridge Crystallographic Data Centre via [www.ccdc.cam.ac.uk/data\\_request/cif](http://www.ccdc.cam.ac.uk/data_request/cif).



|                                             | 2                                                                                | 3                                                              |
|---------------------------------------------|----------------------------------------------------------------------------------|----------------------------------------------------------------|
| Empirical formula                           | C <sub>36</sub> H <sub>52</sub> In <sub>2</sub> N <sub>4</sub> O <sub>0.08</sub> | C <sub>36</sub> H <sub>52</sub> N <sub>4</sub> Tl <sub>2</sub> |
| CCDC No.                                    | 1504565                                                                          | 1504564                                                        |
| Formula weight                              | 771.73                                                                           | 949.55                                                         |
| Temperature/K                               | 123.0(2)                                                                         | 123.3(6)                                                       |
| Crystal system                              | triclinic                                                                        | triclinic                                                      |
| Space group                                 | <b>PError!</b>                                                                   | <b>PError!</b>                                                 |
| a/Å                                         | 11.49565(18)                                                                     | 11.1313(3)                                                     |
| b/Å                                         | 12.7946(2)                                                                       | 12.0117(3)                                                     |
| c/Å                                         | 14.8078(2)                                                                       | 14.7648(4)                                                     |
| α/°                                         | 106.4107(14)                                                                     | 66.579(3)                                                      |
| β/°                                         | 108.2254(14)                                                                     | 78.590(3)                                                      |
| γ/°                                         | 99.2006(15)                                                                      | 80.819(2)                                                      |
| Volume/Å <sup>3</sup>                       | 1909.34(6)                                                                       | 1768.50(10)                                                    |
| Z                                           | 2                                                                                | 2                                                              |
| ρ <sub>calc</sub> /cm <sup>3</sup>          | 1.342                                                                            | 1.783                                                          |
| μ/mm <sup>-1</sup>                          | 9.845                                                                            | 17.502                                                         |
| F(000)                                      | 789.0                                                                            | 916.0                                                          |
| Crystal size/mm <sup>3</sup>                | 0.118 × 0.074 × 0.025                                                            | 0.14 × 0.111 × 0.054                                           |
| Radiation                                   | CuKα (λ = 1.54184)                                                               | CuKα (λ = 1.54184)                                             |
| 2θ range for data collection/°              | 6.722 to 150.89                                                                  | 6.598 to 148.144                                               |
| Index ranges                                | -14 ≤ h ≤ 14, -14 ≤ k ≤ 15, -18 ≤ l ≤ 18                                         | -13 ≤ h ≤ 13, -14 ≤ k ≤ 14, -18 ≤ l ≤ 18                       |
| Reflections collected                       | 89347                                                                            | 43841                                                          |
| Independent reflections                     | 7726 [R <sub>int</sub> = 0.0745, R <sub>sigma</sub> = 0.0290]                    | 7001 [R <sub>int</sub> = 0.0767, R <sub>sigma</sub> = 0.0364]  |
| Data/restraints/parameters                  | 7726/24/436                                                                      | 7001/12/412                                                    |
| Goodness-of-fit on F <sup>2</sup>           | 1.058                                                                            | 1.042                                                          |
| Final R indexes [I ≥ 2σ (I)]                | R <sub>1</sub> = 0.0291, wR <sub>2</sub> = 0.0722                                | R <sub>1</sub> = 0.0267, wR <sub>2</sub> = 0.0645              |
| Final R indexes [all data]                  | R <sub>1</sub> = 0.0333, wR <sub>2</sub> = 0.0750                                | R <sub>1</sub> = 0.0314, wR <sub>2</sub> = 0.0673              |
| Largest diff. peak/hole / e Å <sup>-3</sup> | 0.96/-0.51                                                                       | 1.31/-1.42                                                     |

## 6. Computational Details

Calculations were performed using the Gaussian 09 program package<sup>S7</sup> using the B3LYP functional<sup>S8</sup> and LANL2DZ basis sets<sup>S9</sup> in conjunction with the related quasi-relativistic pseudopotentials for indium and thallium. When X-ray data were available, the geometry optimization were performed using the XYZ coordinates as initial structures and freezing the metal–metal distances. In a second optimization step, these restraints have been removed and the absence of imaginary frequencies confirmed stationary points as minima. The free energies (given in kJ mol<sup>-1</sup>) were calculated for standard conditions, i.e., 298.15 K and 1 bar. To derive the contribution of London dispersion the D3 version of Grimme’s dispersion with the original zero-damping function was used.<sup>S10</sup>

The coordinates of the optimized structures are given in the following:

### **B3LYP-LANL2DZ**

#### **In<sub>2</sub><sup>OP</sup>**

|    |             |             |             |
|----|-------------|-------------|-------------|
| In | 3.21545200  | -0.31310900 | -1.06392000 |
| In | -3.21595200 | 0.31537000  | 1.06424700  |
| C  | -5.67265200 | 0.17574100  | -2.87113000 |
| H  | -6.47516200 | 0.87312500  | -2.60520300 |
| H  | -6.10375400 | -0.83183800 | -2.82917500 |
| H  | -5.36108500 | 0.37616000  | -3.89960100 |
| C  | 0.34251100  | -0.69724600 | 0.04341100  |
| H  | -0.29315800 | -1.36599200 | 0.63758400  |
| H  | 0.38759900  | -1.12064400 | -0.96962700 |
| C  | -6.18737500 | -3.65087900 | -1.35587900 |
| H  | -7.06662600 | -4.14760300 | -0.92545800 |
| H  | -5.47922800 | -4.43318400 | -1.66033600 |
| H  | -6.51396300 | -3.11793800 | -2.25812800 |
| C  | 5.05666400  | 3.47338700  | -0.91561600 |
| H  | 5.90896100  | 3.93175400  | -1.43455300 |
| H  | 4.36137600  | 4.27572700  | -0.63296900 |
| H  | 4.54863600  | 2.81279300  | -1.63038800 |
| C  | 6.44062300  | 1.52332600  | -0.05013700 |
| C  | -3.23478400 | 0.57806100  | -2.49497600 |

|   |             |             |             |
|---|-------------|-------------|-------------|
| H | -3.24900300 | 0.69153200  | -3.57299000 |
| C | 5.52363400  | 2.68902800  | 0.34056400  |
| H | 4.62974600  | 2.27430400  | 0.81926600  |
| C | -8.57541400 | -0.77232700 | 0.98896600  |
| H | -9.55173600 | -1.00679900 | 1.40658700  |
| N | -4.70166800 | 0.14477500  | -0.57816200 |
| C | 6.38505100  | -3.02840000 | -1.59578500 |
| H | 5.65845300  | -2.49406700 | -2.22122200 |
| H | 6.05754600  | -4.07296600 | -1.50344200 |
| H | 7.34811600  | -3.02194300 | -2.12302800 |
| C | -7.70938500 | -1.80409400 | 0.59652300  |
| H | -8.02340500 | -2.83857400 | 0.71644400  |
| C | 7.71160600  | 1.80163100  | -0.59501300 |
| H | 8.02695200  | 2.83584700  | -0.71371100 |
| N | -1.72885100 | 0.60687100  | -0.56684100 |
| N | 4.70177100  | -0.14490400 | 0.57817900  |
| C | -6.43857300 | -1.52480800 | 0.05172800  |
| C | -4.49285800 | 0.30235400  | -1.90931200 |
| C | 6.19285400  | 3.64920100  | 1.35854100  |
| H | 7.07173700  | 4.14578000  | 0.92719200  |
| H | 6.52045800  | 3.11562700  | 2.26005000  |
| H | 5.48551700  | 4.43169200  | 1.66440600  |
| N | 1.72856900  | -0.60512200 | 0.56724000  |
| C | -8.17152000 | 0.56322600  | 0.84521900  |
| H | -8.84324200 | 1.36050000  | 1.15574000  |
| C | -6.38869300 | 3.02873600  | 1.59135200  |
| H | -7.35155600 | 3.02140300  | 2.11895700  |
| H | -6.06277200 | 4.07368600  | 1.49775100  |
| H | -5.66107700 | 2.49616800  | 2.21711600  |
| C | 8.57614600  | 0.76923600  | -0.98911100 |
| H | 9.55264100  | 1.00298300  | -1.40673200 |
| C | 6.90804600  | -0.89455500 | -0.30910700 |
| C | -6.04072800 | -0.16340200 | -0.09526800 |
| C | -1.95403000 | 0.71436400  | -1.89454600 |
| C | 6.04103500  | 0.16225400  | 0.09520300  |
| C | 1.95392100  | -0.71306200 | 1.89487800  |
| C | 5.67307600  | -0.17742100 | 2.87102200  |
| H | 6.47659000  | -0.87272900 | 2.60280400  |
| H | 5.36217100  | -0.38117900 | 3.89903900  |
| H | 6.10254800  | 0.83098700  | 2.83181200  |
| C | 0.80659300  | -1.02610100 | 2.85861700  |
| H | -0.02416900 | -0.31726800 | 2.76284300  |
| H | 1.15753900  | -0.99597500 | 3.89306000  |
| H | 0.40111700  | -2.03012600 | 2.67140400  |
| C | 4.49306800  | -0.30290700 | 1.90930300  |
| C | 8.17051400  | -0.56596500 | -0.84705100 |
| H | 8.84105700  | -1.36372100 | -1.15887800 |
| C | 3.23487200  | -0.57777000 | 2.49510500  |

|   |             |             |             |
|---|-------------|-------------|-------------|
| C | -6.90931800 | 0.89279200  | 0.30726200  |
| C | -0.34284800 | 0.69922100  | -0.04288700 |
| H | -0.38810200 | 1.12257500  | 0.97016500  |
| H | 0.29282000  | 1.36803300  | -0.63698600 |
| C | 6.50969900  | -2.37150800 | -0.19449000 |
| H | 5.52469400  | -2.42407200 | 0.28265200  |
| C | 7.49863300  | -3.17421300 | 0.69195200  |
| H | 7.15634400  | -4.21215800 | 0.80023000  |
| H | 7.58552600  | -2.73867800 | 1.69564600  |
| H | 8.50359000  | -3.19842300 | 0.25082300  |
| C | -6.51291800 | 2.37012400  | 0.19081800  |
| H | -5.52811500 | 2.42343500  | -0.28665800 |
| C | -0.80672900 | 1.02787300  | -2.85816200 |
| H | 0.02430500  | 0.31935800  | -2.76235200 |
| H | -0.40164100 | 2.03203400  | -2.67084700 |
| H | -1.15756700 | 0.99766100  | -3.89263900 |
| C | -5.52005700 | -2.68981500 | -0.33746000 |
| H | -4.62604800 | -2.27442000 | -0.81535700 |
| C | -5.05373400 | -3.47340700 | 0.91942400  |
| H | -5.90613300 | -3.93243200 | 1.43760900  |
| H | -4.54702600 | -2.81217600 | 1.63453900  |
| H | -4.35744700 | -4.27520100 | 0.63768300  |
| C | -7.50316400 | 3.17059600  | -0.69617400 |
| H | -8.50793100 | 3.19430300  | -0.25459000 |
| H | -7.59010600 | 2.73366600  | -1.69926000 |
| H | -7.16205600 | 4.20877100  | -0.80594700 |
| H | 3.24920700  | -0.69153400 | 3.57308700  |

### **ln<sub>2</sub><sup>dim</sup>**

|    |             |             |             |
|----|-------------|-------------|-------------|
| ln | -1.23165100 | 0.47229700  | -0.62802900 |
| ln | 2.10389900  | 1.11439200  | -1.31959000 |
| C  | 3.03855900  | -1.02632100 | 2.70106200  |
| H  | 4.12168400  | -0.90815000 | 2.83047400  |
| H  | 2.87120700  | -2.05148300 | 2.35356700  |
| H  | 2.56108700  | -0.90165800 | 3.67679700  |
| C  | -0.53520800 | 3.43043200  | -1.21167300 |
| H  | -0.87416300 | 4.39178700  | -1.61895800 |
| H  | -0.16022500 | 2.84721800  | -2.06353600 |
| C  | 1.56526200  | -3.98030900 | 0.23238400  |
| H  | 2.09575600  | -4.87265200 | -0.12606600 |
| H  | 0.48797900  | -4.18973000 | 0.19120900  |
| H  | 1.84206600  | -3.82744300 | 1.28367000  |
| C  | -1.33000500 | -1.97471800 | 2.88519600  |
| H  | -1.43908400 | -3.04497000 | 3.10573100  |
| H  | -0.78430000 | -1.50987200 | 3.71733700  |
| H  | -0.71864700 | -1.87707200 | 1.97986700  |
| C  | -3.44722500 | -1.88084900 | 1.48345700  |

|   |             |             |             |
|---|-------------|-------------|-------------|
| C | 1.67227400  | 1.01251900  | 2.23088300  |
| H | 1.48182700  | 0.92770000  | 3.29496400  |
| C | -2.71450400 | -1.29877100 | 2.69840800  |
| H | -2.53741700 | -0.23342200 | 2.51345900  |
| C | 5.72438000  | -2.99047400 | -0.93216400 |
| H | 6.45544500  | -3.71272600 | -1.28824100 |
| N | 2.85212800  | -0.11072700 | 0.39530600  |
| C | -3.84769800 | -1.46699600 | -3.28327300 |
| H | -2.77143600 | -1.43596500 | -3.07014300 |
| H | -4.03580900 | -0.87285300 | -4.18788200 |
| H | -4.11477800 | -2.50933100 | -3.50194700 |
| C | 4.35467200  | -3.28463000 | -0.99022900 |
| H | 4.02950000  | -4.24050900 | -1.39487600 |
| C | -3.83783200 | -3.23650700 | 1.50637200  |
| H | -3.63005400 | -3.83608100 | 2.38983600  |
| N | 1.22695600  | 2.44550600  | 0.29969300  |
| N | -3.27656000 | 0.27494200  | 0.23565700  |
| C | 3.38645800  | -2.36244400 | -0.53777100 |
| C | 2.50028000  | -0.00785700 | 1.69652800  |
| C | -3.55152400 | -1.41501500 | 3.99965100  |
| H | -3.73484000 | -2.46390500 | 4.26659900  |
| H | -4.52710500 | -0.92228500 | 3.89931100  |
| H | -3.01866900 | -0.94603800 | 4.83778500  |
| N | -1.63620900 | 2.65663400  | -0.58367600 |
| C | 6.14553100  | -1.75410500 | -0.41891400 |
| H | 7.20828900  | -1.52511500 | -0.38406000 |
| C | 6.28978900  | 1.41038000  | -0.59317500 |
| H | 7.15023100  | 0.92115200  | -1.06913800 |
| H | 6.61855300  | 2.39108900  | -0.22231300 |
| H | 5.52835800  | 1.57283600  | -1.36689400 |
| C | -4.48518100 | -3.82662400 | 0.41087600  |
| H | -4.77781200 | -4.87336900 | 0.44672300  |
| C | -4.37647400 | -1.69969700 | -0.80407800 |
| C | 3.82585600  | -1.11449100 | -0.00916800 |
| C | 1.14024800  | 2.18151000  | 1.61888800  |
| C | -3.72724900 | -1.10786500 | 0.31936000  |
| C | -2.69640900 | 3.30127100  | -0.05326300 |
| C | -5.46614100 | 0.91204400  | 1.23814100  |
| H | -6.08469900 | 0.37730500  | 0.50725500  |
| H | -6.00155700 | 1.81195200  | 1.55220700  |
| H | -5.35691200 | 0.24857300  | 2.10327300  |
| C | -2.77382100 | 4.83082000  | -0.08571400 |
| H | -1.86510200 | 5.29705900  | 0.31350300  |
| H | -3.62326300 | 5.18174300  | 0.50556100  |
| H | -2.90845700 | 5.19585300  | -1.11315400 |
| C | -4.10612700 | 1.26785700  | 0.64046700  |
| C | -4.74571600 | -3.05951300 | -0.73432200 |
| H | -5.24014600 | -3.52223100 | -1.58545300 |

|   |             |             |             |
|---|-------------|-------------|-------------|
| C | -3.81285900 | 2.64877400  | 0.53505700  |
| C | 5.21676700  | -0.80160600 | 0.04897900  |
| C | 0.66549200  | 3.69973100  | -0.25687000 |
| H | 1.44439600  | 4.19484600  | -0.85707800 |
| H | 0.36240600  | 4.40895700  | 0.52096100  |
| C | -4.67089700 | -0.91443300 | -2.08864200 |
| H | -4.36332200 | 0.12547500  | -1.93304300 |
| C | -6.18386500 | -0.90422900 | -2.43214200 |
| H | -6.36824100 | -0.28437300 | -3.31981900 |
| H | -6.78141800 | -0.49999400 | -1.60487200 |
| H | -6.55434000 | -1.91478800 | -2.64835200 |
| C | 5.72945900  | 0.54731900  | 0.56986100  |
| H | 4.88357800  | 1.09369400  | 1.00056700  |
| C | 0.44726500  | 3.15741300  | 2.57686100  |
| H | -0.58120300 | 3.37222600  | 2.26205100  |
| H | 0.98889500  | 4.11156100  | 2.63321300  |
| H | 0.41215000  | 2.73685200  | 3.58478600  |
| C | 1.90263500  | -2.73680200 | -0.63364000 |
| H | 1.30834800  | -1.89820200 | -0.25293700 |
| C | 1.47374300  | -2.97371500 | -2.10579200 |
| H | 2.02770800  | -3.80940100 | -2.55418600 |
| H | 1.65534900  | -2.08110700 | -2.71717700 |
| H | 0.40286200  | -3.20999300 | -2.15783800 |
| C | 6.79472200  | 0.38441100  | 1.68517400  |
| H | 7.70392600  | -0.10208200 | 1.30866300  |
| H | 6.41471700  | -0.21985000 | 2.51923200  |
| H | 7.08394800  | 1.36769200  | 2.08015800  |
| H | -4.57956600 | 3.30976300  | 0.92302900  |

#### In<sub>4</sub>

|    |             |             |             |
|----|-------------|-------------|-------------|
| In | -1.24052200 | 1.41283400  | -0.30969400 |
| In | 1.24532200  | -1.42036300 | 0.31233300  |
| In | 1.62939400  | 1.62511300  | 0.89501900  |
| In | -1.63291800 | -1.61689700 | -0.89758700 |
| N  | -0.52610100 | 1.75372300  | -2.35409000 |
| C  | -1.24132400 | 5.77444800  | 2.80077800  |
| H  | -1.39800700 | 6.46918400  | 1.96641400  |
| H  | -0.20331400 | 5.88468500  | 3.14291700  |
| H  | -1.90158200 | 6.08443300  | 3.62188600  |
| C  | -0.38078800 | 2.94911800  | -2.95033800 |
| C  | 6.09501500  | 2.71188500  | 1.11380700  |
| H  | 6.04393400  | 3.69281900  | 0.63237800  |
| H  | 6.59424600  | 2.03598700  | 0.40910600  |
| H  | 6.71830200  | 2.78922400  | 2.00874800  |
| C  | -0.86774200 | 4.17110100  | -2.40395100 |
| H  | -0.60935700 | 5.05876100  | -2.97019000 |
| C  | -3.67509000 | -4.34148100 | 0.80739800  |
| N  | -2.25134200 | -0.83882800 | -2.90946100 |

|   |             |             |             |
|---|-------------|-------------|-------------|
| C | 0.07897600  | -0.51605800 | 3.02761600  |
| H | -0.71898600 | -0.70953300 | 3.75501200  |
| H | -0.35782800 | 0.14346800  | 2.26750000  |
| C | 6.24925600  | 0.43880400  | -2.07688100 |
| H | 6.51846400  | 0.73422500  | -3.10001300 |
| H | 6.44995300  | -0.63554500 | -1.97326400 |
| H | 6.91372200  | 0.97904100  | -1.39143800 |
| C | -1.20454300 | -0.23603500 | -3.78215300 |
| H | -0.72399000 | -1.03666400 | -4.37052100 |
| H | -1.64428200 | 0.47070200  | -4.49530400 |
| C | -3.17259100 | -5.16983200 | -0.38218000 |
| H | -2.99482100 | -4.48842200 | -1.22122200 |
| N | -2.12882300 | 3.44679300  | -0.42067400 |
| N | -3.71148800 | -2.26338700 | -0.55856800 |
| C | -3.78784300 | -0.55233200 | -4.86119600 |
| H | -3.73156700 | 0.54143400  | -4.94921200 |
| H | -4.79520700 | -0.85917300 | -5.15156800 |
| H | -3.08128200 | -0.97851700 | -5.58440100 |
| C | -3.95718500 | -2.94535200 | 0.70518400  |
| C | -3.21356400 | 3.75307900  | 0.49946500  |
| C | 5.61917400  | -1.85863000 | 1.44420400  |
| H | 6.55726400  | -1.86468900 | 0.87240700  |
| H | 5.85697300  | -1.58508500 | 2.48099900  |
| H | 4.97333400  | -1.07491300 | 1.03377300  |
| C | -1.72224100 | 4.39844500  | -1.29909200 |
| C | -3.87122200 | 0.08068200  | 2.77486900  |
| H | -4.07126900 | -0.21115600 | 3.81537700  |
| H | -4.07336500 | 1.15472900  | 2.67798300  |
| H | -2.80903200 | -0.08378300 | 2.56648600  |
| C | 4.56610800  | -3.63303000 | -0.04779100 |
| C | 4.58223800  | 1.61829600  | 2.75898400  |
| H | 5.49379400  | 1.64967400  | 3.34443000  |
| C | 4.92183600  | -3.24261400 | 1.39305400  |
| H | 3.99317900  | -3.15954600 | 1.96640000  |
| C | 0.35201900  | 3.07268400  | -4.28876100 |
| H | 1.40897400  | 2.79309100  | -4.18361400 |
| H | 0.31457000  | 4.10395900  | -4.64785000 |
| H | -0.09137900 | 2.43021800  | -5.06000400 |
| C | -2.23154200 | 5.83016700  | -1.13628000 |
| H | -1.69860800 | 6.50802500  | -1.80850700 |
| H | -2.10292600 | 6.18066700  | -0.10695100 |
| H | -3.30236200 | 5.89454100  | -1.36308000 |
| C | -4.02507600 | 4.35477700  | 2.72374300  |
| H | -3.82444200 | 4.64367800  | 3.75315200  |
| C | -1.51538800 | 4.30486500  | 2.38199300  |
| H | -0.81039300 | 4.04794100  | 1.58359400  |
| C | 4.36148200  | 4.29063000  | -3.16327800 |
| H | 4.52522000  | 4.80710100  | -4.10656300 |

|   |             |             |             |
|---|-------------|-------------|-------------|
| C | -2.94130100 | 4.12479700  | 1.84841900  |
| C | -3.48231000 | -1.01290700 | -3.43096200 |
| N | 3.70733700  | 2.26985300  | 0.55645800  |
| C | -4.75432600 | -0.72220900 | 1.78556600  |
| H | -4.52717300 | -0.35697200 | 0.77846600  |
| C | 1.22829100  | -3.36247700 | -3.57171900 |
| H | 1.42221700  | -2.31771700 | -3.30117800 |
| H | 0.17756000  | -3.45042700 | -3.87942400 |
| H | 1.85702400  | -3.60845600 | -4.43822500 |
| C | 4.62702200  | 2.91785400  | -3.05357000 |
| H | 4.99875500  | 2.37419000  | -3.91955000 |
| C | 5.61330600  | -3.86871500 | -0.96297700 |
| H | 6.64432300  | -3.77234100 | -0.62914100 |
| C | -5.79999600 | 4.30964700  | -2.08543400 |
| H | -6.77644200 | 4.40507200  | -1.59236000 |
| H | -5.98190900 | 4.03247700  | -3.13269900 |
| H | -5.32429200 | 5.29849100  | -2.07456800 |
| C | -5.35264500 | 4.22489700  | 2.29214600  |
| H | -6.17418700 | 4.40615400  | 2.98143400  |
| N | 2.24686400  | 0.84310500  | 2.90647900  |
| N | 2.13232100  | -3.45370700 | 0.42470900  |
| C | -3.88814700 | -4.98809300 | 2.04299200  |
| H | -3.68193900 | -6.05255600 | 2.12895600  |
| C | 4.43268300  | 2.22629600  | -1.83789300 |
| C | 4.70670400  | 2.17965100  | 1.46705100  |
| C | 5.80934100  | -4.31253500 | 2.08361000  |
| H | 6.78521500  | -4.40508600 | 1.58885400  |
| H | 5.33662700  | -5.30284000 | 2.07368900  |
| H | 5.99229900  | -4.03465000 | 3.13050300  |
| C | -4.71083700 | -2.17452800 | -1.46915900 |
| N | 0.52977700  | -1.75865200 | 2.35614700  |
| C | -1.82859900 | -5.87338700 | -0.06328200 |
| H | -1.07501700 | -5.14690300 | 0.26105300  |
| H | -1.45175200 | -6.39298200 | -0.95499500 |
| H | -1.94508300 | -6.62038800 | 0.73393400  |
| C | 3.88683700  | 4.99352800  | -2.04599100 |
| H | 3.68125700  | 6.05807400  | -2.13249400 |
| C | -4.43524100 | -2.22110300 | 1.83635100  |
| C | 1.82599000  | 5.87868900  | 0.06046000  |
| H | 1.94133200  | 6.62508800  | -0.73749300 |
| H | 1.44923100  | 6.39870600  | 0.95198100  |
| H | 1.07292400  | 5.15123100  | -0.26289500 |
| C | -5.61190900 | 3.86214900  | 0.96183600  |
| H | -6.64242700 | 3.76573300  | 0.62646700  |
| C | 5.35203400  | -4.23081400 | -2.29307600 |
| H | 6.17254800  | -4.41187300 | -2.98364200 |
| C | 2.94131000  | -4.13036300 | -1.84590400 |
| C | 3.95415800  | 2.95131100  | -0.70739500 |



|   |             |             |             |
|---|-------------|-------------|-------------|
| C | 3.47820100  | 1.01573900  | 3.42762000  |
| C | 3.21566400  | -3.75994500 | -0.49702000 |
| C | -4.62875300 | -2.91324600 | 3.05182600  |
| H | -5.00021900 | -2.37006300 | 3.91822500  |
| C | 0.38596500  | -2.95303100 | 2.95483300  |
| C | -4.56335700 | 3.62614600  | 0.04826000  |
| C | -6.09912000 | -2.70651500 | -1.11532400 |
| H | -6.04799300 | -3.68668000 | -0.63235200 |
| H | -6.72232900 | -2.78530000 | -2.01020000 |
| H | -6.59848700 | -2.02954900 | -0.41170900 |
| C | 2.23815600  | -5.83570800 | 1.14425200  |
| H | 2.11336600  | -6.18641300 | 0.11453700  |
| H | 1.70325200  | -6.51368900 | 1.81481300  |
| H | 3.30823200  | -5.89951200 | 1.37492500  |
| C | -4.91707800 | 3.23683100  | -1.39339200 |
| H | -3.98739400 | 3.15128600  | -1.96469700 |
| C | -4.58643600 | -1.61456200 | -2.76183400 |
| C | -0.34751600 | -3.07489700 | 4.29302200  |
| H | 0.09278300  | -2.42838900 | 5.06264500  |
| H | -0.30679300 | -4.10488100 | 4.65547500  |
| H | -1.40536500 | -2.79939000 | 4.18585300  |
| C | 1.72773500  | -4.40420200 | 1.30526600  |
| C | -0.07951900 | 0.51197800  | -3.02997600 |
| H | 0.71833700  | 0.70538900  | -3.75747800 |
| H | 0.35581700  | -0.15162900 | -2.27251800 |
| C | 4.02382400  | -4.36005600 | -2.72288600 |
| H | 3.82169300  | -4.64808800 | -3.75224300 |
| C | 0.87458400  | -4.17551500 | 2.41091600  |
| C | 3.67305000  | 4.34755600  | -0.81019000 |
| C | 1.20065600  | 0.23822500  | 3.77873500  |
| H | 0.71652400  | 1.03856300  | 4.36442800  |
| H | 1.64185700  | -0.46511800 | 4.49418800  |
| C | 1.51457600  | -4.30944600 | -2.37763600 |
| H | 0.81068200  | -4.05039400 | -1.57897000 |
| C | -4.36271800 | -4.28597100 | 3.16079800  |
| H | -4.52591200 | -4.80297700 | 4.10388700  |
| C | 1.23854800  | -5.77949700 | -2.79347900 |
| H | 0.20033800  | -5.88909400 | -3.13518200 |
| H | 1.39448400  | -6.47268600 | -1.95767800 |
| H | 1.89830800  | -6.09190800 | -3.61407300 |
| C | 3.17086200  | 5.17664700  | 0.37899800  |
| H | 2.99440300  | 4.49591800  | 1.21887800  |
| C | 3.78495200  | 0.55253200  | 4.85680100  |
| H | 3.72875500  | -0.54137700 | 4.94292600  |
| H | 3.07927500  | 0.97756200  | 5.58152900  |
| H | 4.79265800  | 0.85872000  | 5.14665300  |
| C | 4.75160200  | 0.72735800  | -1.78606300 |
| H | 4.52400800  | 0.36272400  | -0.77882700 |

|   |             |             |             |
|---|-------------|-------------|-------------|
| C | -5.61846900 | 1.85505600  | -1.44676700 |
| H | -6.55746900 | 1.86329200  | -0.87649200 |
| H | -4.97561000 | 1.06902600  | -1.03621100 |
| H | -5.85541500 | 1.58313000  | -2.48416300 |
| C | 3.86887500  | -0.07614500 | -2.77520600 |
| H | 4.06899200  | 0.21536100  | -3.81579700 |
| H | 2.80664300  | 0.08793500  | -2.56696500 |
| H | 4.07130900  | -1.15011800 | -2.67787800 |
| C | -1.22949800 | 3.35632300  | 3.57493200  |
| H | -0.17929100 | 3.44501100  | 3.88423800  |
| H | -1.42205700 | 2.31176100  | 3.30270800  |
| H | -1.85972000 | 3.60034300  | 4.44090700  |
| C | 4.22755300  | 6.21862900  | 0.83662700  |
| H | 4.44726800  | 6.93876200  | 0.03694300  |
| H | 5.17148200  | 5.73971100  | 1.12498400  |
| H | 3.85591500  | 6.78188300  | 1.70342200  |
| C | -6.25189400 | -0.43398900 | 2.07707500  |
| H | -6.52077400 | -0.73033800 | 3.10002600  |
| H | -6.91643100 | -0.97377500 | 1.39134400  |
| H | -6.45274200 | 0.64041800  | 1.97442800  |
| C | -4.22977800 | -6.21055100 | -0.84158500 |
| H | -4.45086000 | -6.93102600 | -0.04257600 |
| H | -3.85781200 | -6.77352500 | -1.70842400 |
| H | -5.17299300 | -5.73060400 | -1.13052700 |
| H | 0.61779100  | -5.06234800 | 2.97919400  |
| H | -5.49790200 | -1.64676700 | -3.34739900 |

### Tl<sub>2</sub><sup>op</sup>

|   |             |             |             |
|---|-------------|-------------|-------------|
| C | 5.61390900  | -0.06748700 | 3.08184400  |
| H | 6.40741000  | 0.67796100  | 2.94729600  |
| H | 6.08246900  | -1.05239200 | 2.96441800  |
| H | 5.22990600  | 0.01458000  | 4.10205400  |
| C | -0.34179700 | -0.69278600 | -0.10761700 |
| H | 0.31252200  | -1.30855700 | -0.74076800 |
| H | -0.39008000 | -1.19979200 | 0.86768900  |
| C | 6.18560700  | -3.81169800 | 1.26335500  |
| H | 7.06692500  | -4.29293000 | 0.81924000  |
| H | 5.45351400  | -4.59913500 | 1.48823000  |
| H | 6.49703500  | -3.35560000 | 2.21180500  |
| C | -5.11498600 | 3.43000100  | 1.01661400  |
| H | -5.96934100 | 3.85771100  | 1.55778800  |
| H | -4.40150200 | 4.24079700  | 0.81515400  |
| H | -4.63059500 | 2.70498900  | 1.68529100  |
| C | -6.52186200 | 1.58915900  | -0.03794400 |
| C | 3.20562600  | 0.38309000  | 2.58699200  |
| H | 3.17777200  | 0.42479400  | 3.67060800  |
| C | -5.56750500 | 2.75847300  | -0.30791200 |
| H | -4.67198800 | 2.35710700  | -0.79422600 |

|   |             |             |             |
|---|-------------|-------------|-------------|
| C | 8.69579800  | -0.80463100 | -0.78096400 |
| H | 9.67595500  | -1.02215600 | -1.19885800 |
| N | 4.79801100  | 0.05452400  | 0.73952400  |
| C | -6.52982300 | -3.07451000 | 1.05473000  |
| H | -5.77920700 | -2.60965200 | 1.70856900  |
| H | -6.22188600 | -4.11157100 | 0.86325700  |
| H | -7.47840700 | -3.09939500 | 1.60732400  |
| C | 7.79829700  | -1.84736000 | -0.50313100 |
| H | 8.09318200  | -2.87415300 | -0.70964300 |
| C | -7.79842400 | 1.84719100  | 0.50321600  |
| H | -8.09340800 | 2.87398400  | 0.70958500  |
| N | 1.71860600  | 0.56030500  | 0.63534300  |
| N | -4.79808000 | -0.05453100 | -0.73953000 |
| C | 6.52168900  | -1.58926800 | 0.03789400  |
| C | 4.49578200  | 0.13070000  | 2.05360300  |
| C | -6.18626300 | 3.81138200  | -1.26390500 |
| H | -7.06757200 | 4.29259200  | -0.81974800 |
| H | -6.49778300 | 3.35504300  | -2.21220900 |
| H | -5.45430800 | 4.59886700  | -1.48906200 |
| N | -1.71864600 | -0.56018400 | -0.63560700 |
| C | 8.31800000  | 0.52105100  | -0.51722400 |
| H | 9.01507800  | 1.32769300  | -0.73412800 |
| C | 6.53054200  | 3.07470400  | -1.05383400 |
| H | 7.47926100  | 3.09959800  | -1.60619600 |
| H | 6.22270800  | 4.11175800  | -0.86216100 |
| H | 5.78001700  | 2.61012700  | -1.70797500 |
| C | -8.69575300 | 0.80440000  | 0.78137100  |
| H | -9.67587300 | 1.02187600  | 1.19937900  |
| C | -7.05224500 | -0.82808700 | -0.02428700 |
| C | 6.14402200  | -0.23791100 | 0.30190400  |
| C | 1.93741700  | 0.57207000  | 1.96343400  |
| C | -6.14407400 | 0.23780500  | -0.30179000 |
| C | -1.93756700 | -0.57195700 | -1.96368000 |
| C | -5.61417400 | 0.06745900  | -3.08178700 |
| H | -6.40763100 | -0.67802900 | -2.94720900 |
| H | -5.23024300 | -0.01455600 | -4.10202900 |
| H | -6.08277100 | 1.05233800  | -2.96429300 |
| C | -0.77751200 | -0.82383000 | -2.93950100 |
| H | 0.03808000  | -0.10273300 | -2.80215100 |
| H | -1.12202800 | -0.74647800 | -3.97351900 |
| H | -0.35689000 | -1.82949400 | -2.80023600 |
| C | -4.49596300 | -0.13071300 | -2.05363500 |
| C | -8.31782700 | -0.52128300 | 0.51781500  |
| H | -9.01476300 | -1.32797500 | 0.73499200  |
| C | -3.20583700 | -0.38303500 | -2.58713200 |
| C | 7.05236600  | 0.82791600  | 0.02472600  |
| C | 0.34179900  | 0.69291300  | 0.10724600  |
| H | 0.39014500  | 1.19989600  | -0.86806800 |

|    |             |             |             |
|----|-------------|-------------|-------------|
| H  | -0.31255500 | 1.30870400  | 0.74034400  |
| C  | -6.67813200 | -2.29308200 | -0.27886000 |
| H  | -5.70427600 | -2.31112500 | -0.78018300 |
| C  | -7.69556100 | -3.00472200 | -1.20860600 |
| H  | -7.36267500 | -4.02865700 | -1.42611900 |
| H  | -7.80644800 | -2.47270400 | -2.16210300 |
| H  | -8.68886800 | -3.06870400 | -0.74542400 |
| C  | 6.67842200  | 2.29290400  | 0.27958700  |
| H  | 5.70445400  | 2.31096400  | 0.78069500  |
| C  | 0.77728400  | 0.82396200  | 2.93915800  |
| H  | -0.03832000 | 0.10289600  | 2.80172200  |
| H  | 0.35670900  | 1.82964300  | 2.79987400  |
| H  | 1.12170700  | 0.74658000  | 3.97320500  |
| C  | 5.56713800  | -2.75851100 | 0.30748200  |
| H  | 4.67159600  | -2.35712600 | 0.79373400  |
| C  | 5.11473500  | -3.42971200 | -1.01725000 |
| H  | 5.96911700  | -3.85743200 | -1.55837400 |
| H  | 4.63055000  | -2.70450000 | -1.68585800 |
| H  | 4.40110800  | -4.24045000 | -0.81606400 |
| C  | 7.69573900  | 3.00414100  | 1.20976000  |
| H  | 8.68916800  | 3.06808400  | 0.74683400  |
| H  | 7.80631000  | 2.47185700  | 2.16314600  |
| H  | 7.36296400  | 4.02807300  | 1.42745700  |
| H  | -3.17807300 | -0.42474400 | -3.67075000 |
| TI | -3.34225700 | -0.39545000 | 1.20637400  |
| TI | 3.34237300  | 0.39555300  | -1.20650300 |

### TI<sub>2</sub><sup>dim</sup>

|    |             |             |             |
|----|-------------|-------------|-------------|
| TI | -1.14787500 | -0.33002100 | -0.56017000 |
| TI | 2.19990600  | -1.16013300 | -1.18781800 |
| N  | 2.76006000  | 0.37822600  | 0.64119500  |
| N  | 1.06508800  | -2.26474800 | 0.74132600  |
| N  | -3.47030100 | -0.20926200 | 0.28682700  |
| C  | 1.34860000  | -0.51745400 | 2.44901900  |
| N  | -1.71560400 | -2.71250600 | -0.30593100 |
| C  | 2.25503100  | 0.42396000  | 1.89041300  |
| C  | -3.98832600 | -2.59411400 | 0.61708500  |
| H  | -4.78971500 | -3.23612700 | 0.96705600  |
| C  | -3.91180700 | 1.16656000  | 0.32007100  |
| C  | -4.30072300 | -1.20960700 | 0.64964700  |
| C  | -4.45992200 | 1.75947700  | -0.85828700 |
| C  | -2.82689700 | -3.29401600 | 0.17838600  |
| C  | 5.59702000  | -0.27524600 | 1.10806800  |
| H  | 4.70569900  | -0.77113400 | 1.50652300  |
| C  | -4.58350000 | 3.91697500  | 0.30126800  |
| H  | -4.84129900 | 4.97351100  | 0.29428900  |
| C  | -4.04417500 | 3.32774900  | 1.45505300  |

|   |             |             |             |
|---|-------------|-------------|-------------|
| H | -3.88731200 | 3.93795200  | 2.34217700  |
| C | 1.92159700  | 2.87600700  | -0.72439000 |
| H | 1.29814200  | 2.12087800  | -0.23254000 |
| C | 6.54343700  | 0.01680100  | 2.30145400  |
| H | 6.79009000  | -0.91407000 | 2.82989000  |
| H | 6.07913500  | 0.70366600  | 3.02066800  |
| H | 7.48619000  | 0.47046400  | 1.96829500  |
| C | 3.76838100  | 1.32144600  | 0.21133000  |
| C | 4.40178300  | 3.35611100  | -0.98560200 |
| H | 4.12152900  | 4.26159600  | -1.51968300 |
| C | -5.71256200 | -0.86238100 | 1.13366500  |
| H | -5.67856500 | -0.18507900 | 1.99501500  |
| H | -6.26287900 | -1.76274500 | 1.41956800  |
| H | -6.27727600 | -0.34574900 | 0.34760200  |
| C | 6.26905400  | -1.26020300 | 0.11367200  |
| H | 7.18099300  | -0.82723500 | -0.31841800 |
| H | 5.59479300  | -1.50734600 | -0.71768800 |
| H | 6.54454000  | -2.19480200 | 0.62123900  |
| C | 0.85683300  | -1.77273700 | 1.97657100  |
| C | 5.14925800  | 1.00619100  | 0.39444500  |
| C | 0.55751000  | -3.60477100 | 0.36601200  |
| H | 0.18061800  | -4.17766700 | 1.22175500  |
| H | 1.39104100  | -4.18524100 | -0.06238500 |
| C | 3.39080600  | 2.50713900  | -0.48782500 |
| C | -3.70330000 | 1.95933800  | 1.48895500  |
| C | -0.55877400 | -3.53386100 | -0.71917300 |
| H | -0.12383700 | -3.08239400 | -1.62480000 |
| H | -0.82629000 | -4.56405800 | -0.99399800 |
| C | 5.76031000  | 3.05570000  | -0.80535400 |
| H | 6.52571400  | 3.72215900  | -1.19608300 |
| C | -2.92631600 | -4.82498900 | 0.27368200  |
| H | -2.92534700 | -5.28534000 | -0.72411700 |
| H | -3.85279000 | -5.11743300 | 0.77391200  |
| H | -2.08768000 | -5.25491600 | 0.83655500  |
| C | -4.78570000 | 3.13178800  | -0.84414100 |
| H | -5.20261600 | 3.59047900  | -1.73845100 |
| C | 2.69243900  | 1.55454100  | 2.82684600  |
| H | 3.74875100  | 1.43815700  | 3.10250700  |
| H | 2.09766500  | 1.55699800  | 3.74412300  |
| H | 2.59688000  | 2.53239100  | 2.34186300  |
| C | -3.78995900 | 1.45143900  | -3.29765000 |
| H | -4.02290600 | 2.49214100  | -3.55906600 |
| H | -3.93514400 | 0.83632000  | -4.19632200 |
| H | -2.72776200 | 1.40967900  | -3.02157800 |
| C | 6.12377700  | 1.88525500  | -0.12133100 |
| H | 7.17781300  | 1.65109700  | 0.01232900  |
| C | -1.71341700 | 1.98447400  | 3.07565700  |
| H | -1.01022900 | 1.80461500  | 2.25282600  |

|   |             |             |             |
|---|-------------|-------------|-------------|
| H | -1.28663900 | 1.54064000  | 3.98557900  |
| H | -1.78515500 | 3.06951400  | 3.22965600  |
| C | -4.69233900 | 0.94838700  | -2.13915100 |
| H | -4.41924400 | -0.09255800 | -1.93488800 |
| C | 0.04227300  | -2.56401200 | 3.01107800  |
| H | -0.94978500 | -2.82471900 | 2.62328900  |
| H | -0.09211000 | -1.97395400 | 3.92093700  |
| H | 0.55207300  | -3.49571700 | 3.29228900  |
| C | -3.10568300 | 1.36999100  | 2.77217300  |
| H | -2.96418200 | 0.29462600  | 2.61790800  |
| C | 1.55821800  | 4.25264200  | -0.10756200 |
| H | 1.77978800  | 4.28208300  | 0.96685000  |
| H | 0.48764800  | 4.45890100  | -0.23989400 |
| H | 2.11832100  | 5.06682200  | -0.58606100 |
| C | 1.57220800  | 2.85745100  | -2.23661200 |
| H | 2.15673400  | 3.60548900  | -2.78841800 |
| H | 0.50748100  | 3.08058200  | -2.38846900 |
| H | 1.78389200  | 1.87668000  | -2.68329700 |
| C | -4.04903900 | 1.55034300  | 3.99081100  |
| H | -4.19259200 | 2.61126800  | 4.23438500  |
| H | -3.62559300 | 1.05887400  | 4.87732300  |
| H | -5.03881500 | 1.11598100  | 3.80120200  |
| C | -6.18165800 | 0.96333300  | -2.57410000 |
| H | -6.83565100 | 0.59486400  | -1.77356800 |
| H | -6.32882700 | 0.32426900  | -3.45536700 |
| H | -6.51352500 | 1.97661600  | -2.83636100 |
| H | 1.04240100  | -0.27872800 | 3.46184000  |

#### Tl<sub>4</sub>

|    |             |             |             |
|----|-------------|-------------|-------------|
| Tl | -0.67421700 | -2.07075500 | 0.16802500  |
| Tl | 0.65915000  | 1.99928600  | -0.23817300 |
| Tl | 2.56749300  | -0.93211900 | -0.54955900 |
| Tl | -2.58057800 | 0.85748900  | 0.48332400  |
| N  | -0.02604800 | -2.03030400 | 2.49819400  |
| C  | 2.90974300  | -6.40212300 | -1.47755100 |
| H  | 2.66518500  | -7.09379000 | -0.66235600 |
| H  | 3.93745800  | -6.05146200 | -1.32602100 |
| H  | 2.88426400  | -6.97155700 | -2.41621900 |
| C  | 0.48092100  | -3.01739300 | 3.25410000  |
| C  | 6.85497700  | 1.41343300  | -0.60880800 |
| H  | 7.56693300  | 0.59806200  | -0.78724100 |
| H  | 6.93446600  | 1.67764900  | 0.45089100  |
| H  | 7.16576500  | 2.27109200  | -1.21137900 |
| C  | 0.58137700  | -4.38059600 | 2.85012500  |
| H  | 0.97212100  | -5.03852600 | 3.61888300  |
| C  | -6.62084300 | 1.63267400  | -0.00447000 |
| N  | -2.67689900 | -0.59171900 | 2.51120700  |
| C  | 0.26777300  | 0.49931700  | -3.09292800 |

|   |             |             |             |
|---|-------------|-------------|-------------|
| H | -0.42924100 | 0.25399700  | -3.90786500 |
| H | 0.00429700  | -0.17718500 | -2.26544400 |
| C | 5.17708700  | 2.66290900  | 2.83373300  |
| H | 5.71180300  | 2.48743000  | 3.77665400  |
| H | 4.52246200  | 3.53402100  | 2.96988600  |
| H | 5.92049400  | 2.91597100  | 2.06811600  |
| C | -1.60951800 | -0.30310500 | 3.49908700  |
| H | -1.61268400 | 0.78045900  | 3.69847700  |
| H | -1.78972900 | -0.79567000 | 4.46227600  |
| C | -6.69534000 | 1.88391500  | 1.50725800  |
| H | -6.12515300 | 1.10057000  | 2.01678900  |
| N | -0.19814600 | -4.47296000 | 0.50446100  |
| N | -4.86367800 | -0.10459000 | 0.29473600  |
| C | -3.30888100 | -2.57477300 | 3.91435000  |
| H | -2.28821600 | -2.97197900 | 3.93051000  |
| H | -4.00175700 | -3.41726000 | 3.84802200  |
| H | -3.49680100 | -2.07019800 | 4.87238400  |
| C | -5.70775700 | 0.68832800  | -0.56652400 |
| C | -0.52678800 | -5.29697200 | -0.64329600 |
| C | 4.23912800  | 4.80692500  | -0.21557200 |
| H | 4.79760800  | 5.36567600  | 0.54781600  |
| H | 4.92121800  | 4.58070200  | -1.04444000 |
| H | 3.92803600  | 3.85281500  | 0.22586800  |
| C | 0.22400000  | -5.05421500 | 1.65053200  |
| C | -3.74007800 | 0.21395300  | -3.75005000 |
| H | -4.36261200 | 0.58107400  | -4.57590200 |
| H | -3.05284500 | -0.53636400 | -4.16516600 |
| H | -3.14846300 | 1.05716800  | -3.37296100 |
| C | 1.99936900  | 5.83456800  | 0.40458400  |
| C | 4.91340800  | 1.54546500  | -2.16552600 |
| H | 5.56842300  | 2.28812800  | -2.60824200 |
| C | 3.01865700  | 5.61977400  | -0.72099800 |
| H | 2.54080400  | 5.03414900  | -1.51240900 |
| C | 1.00051300  | -2.72071300 | 4.66846500  |
| H | 1.90254000  | -2.09427400 | 4.62849700  |
| H | 1.26194400  | -3.64814900 | 5.18386600  |
| H | 0.25610400  | -2.19247800 | 5.27781800  |
| C | 0.35546100  | -6.58107300 | 1.70286600  |
| H | 0.69820000  | -6.91107400 | 2.68691400  |
| H | 1.05972600  | -6.94752200 | 0.94757500  |
| H | -0.60809000 | -7.06000500 | 1.49250300  |
| C | 0.08249700  | -6.42158400 | -2.73488300 |
| H | 0.83300900  | -6.69667100 | -3.47327800 |
| C | 1.92635900  | -5.20277700 | -1.51702600 |
| H | 2.04538500  | -4.63878400 | -0.58620700 |
| C | 6.68544400  | -1.49927000 | 3.31363900  |
| H | 7.16945300  | -1.90005700 | 4.20121900  |
| C | 0.46582900  | -5.65524800 | -1.61370900 |

|   |             |             |             |
|---|-------------|-------------|-------------|
| C | -3.52086700 | -1.62071200 | 2.72807200  |
| N | 4.79088600  | 0.09799000  | -0.17579200 |
| C | -4.58862800 | -0.41432200 | -2.61815500 |
| H | -3.89800100 | -0.74844600 | -1.83423000 |
| C | -1.81005000 | 3.91714900  | 2.68438700  |
| H | -1.03778700 | 3.13641700  | 2.69001600  |
| H | -2.79582300 | 3.43399300  | 2.64114400  |
| H | -1.74445700 | 4.45151700  | 3.64122100  |
| C | 5.85189400  | -0.37477600 | 3.40786500  |
| H | 5.68653300  | 0.08655500  | 4.37923300  |
| C | 2.37862800  | 6.61393100  | 1.51753000  |
| H | 3.37145800  | 7.05840300  | 1.54210200  |
| C | -3.58211900 | -6.58727200 | 0.84998200  |
| H | -4.06453800 | -7.25566600 | 0.12439800  |
| H | -4.33900000 | -6.29114300 | 1.58903300  |
| H | -2.80665500 | -7.16287700 | 1.37037000  |
| C | -1.24290200 | -6.84025400 | -2.91600100 |
| H | -1.51757800 | -7.43729500 | -3.78244500 |
| N | 2.78405300  | 0.39611000  | -2.62846200 |
| N | 0.29406800  | 4.39217100  | -0.71661500 |
| C | -7.39955200 | 2.42563600  | -0.87206300 |
| H | -8.09085200 | 3.15360700  | -0.45337600 |
| C | 5.22784300  | 0.17386500  | 2.26767000  |
| C | 5.43394000  | 0.97215600  | -0.97648600 |
| C | 3.49763600  | 6.95810500  | -1.34395500 |
| H | 4.05649400  | 7.56086000  | -0.61566100 |
| H | 2.65727200  | 7.56535500  | -1.70242200 |
| H | 4.16385600  | 6.76415800  | -2.19563500 |
| C | -5.35750900 | -1.17906700 | 0.94174500  |
| N | 0.12135600  | 1.88741300  | -2.60950500 |
| C | -6.02066500 | 3.23847400  | 1.85823900  |
| H | -4.98699400 | 3.27095200  | 1.48931500  |
| H | -6.00415300 | 3.39305700  | 2.94587000  |
| H | -6.56272000 | 4.07837100  | 1.40342000  |
| C | 6.88831100  | -2.10230900 | 2.06348300  |
| H | 7.52550100  | -2.98157600 | 1.99271700  |
| C | -5.56234800 | 0.58740900  | -1.98381400 |
| C | 5.90068000  | -3.76264900 | -0.36571100 |
| H | 6.44829300  | -4.38962600 | 0.35052100  |
| H | 5.96108800  | -4.24746200 | -1.34986100 |
| H | 4.85015400  | -3.74138300 | -0.05069100 |
| C | -2.21140300 | -6.47392200 | -1.97140500 |
| H | -3.24165100 | -6.79203000 | -2.11437400 |
| C | 1.50331700  | 6.82932300  | 2.59227200  |
| H | 1.81400000  | 7.43447700  | 3.44075900  |
| C | -0.20327000 | 5.47217400  | 1.46843300  |
| C | 5.45553600  | -0.43069700 | 0.99578600  |
| C | 3.73337300  | 1.29997600  | -2.92739200 |



|   |             |             |             |
|---|-------------|-------------|-------------|
| C | 0.68898800  | 5.25468500  | 0.37847200  |
| C | -6.37021900 | 1.39621500  | -2.81037200 |
| H | -6.27899500 | 1.31695700  | -3.89091100 |
| C | -0.32254700 | 2.85689900  | -3.42616500 |
| C | -1.87958900 | -5.70225900 | -0.83810900 |
| C | -6.76959500 | -1.67396100 | 0.60863700  |
| H | -7.52326100 | -1.04854700 | 1.10449300  |
| H | -6.91134300 | -2.70172500 | 0.95558400  |
| H | -6.97272300 | -1.62874100 | -0.46604400 |
| C | -0.44545200 | 6.44075000  | -1.92070900 |
| H | -1.01176600 | 6.77933000  | -1.04591800 |
| H | -1.00150200 | 6.70670500  | -2.82370000 |
| H | 0.49822800  | 6.99900500  | -1.92193300 |
| C | -2.99144800 | -5.33298100 | 0.15087100  |
| H | -2.56262800 | -4.69347600 | 0.93166400  |
| C | -4.68333400 | -1.91141800 | 1.95378500  |
| C | -0.69702300 | 2.53554600  | -4.88126300 |
| H | 0.11369500  | 2.01100400  | -5.40237700 |
| H | -0.91209000 | 3.45393100  | -5.43313700 |
| H | -1.58894300 | 1.89747200  | -4.93159600 |
| C | -0.18738900 | 4.93071300  | -1.86151700 |
| C | -0.16800700 | -0.65677800 | 3.01885900  |
| H | 0.51237900  | -0.43197100 | 3.85159300  |
| H | 0.10542400  | 0.04307600  | 2.21385700  |
| C | 0.22349500  | 6.25625500  | 2.56097200  |
| H | -0.45721300 | 6.42555900  | 3.39273600  |
| C | -0.48959600 | 4.22272000  | -3.05459600 |
| C | 6.28387300  | -1.59159700 | 0.89574500  |
| C | 1.69498100  | 0.12638800  | -3.59568900 |
| H | 1.67861000  | -0.95769200 | -3.79832200 |
| H | 1.86125400  | 0.61657200  | -4.56177000 |
| C | -1.61974000 | 4.88720600  | 1.48855100  |
| H | -1.76573900 | 4.32090300  | 0.56125200  |
| C | -7.29138700 | 2.30378300  | -2.26598000 |
| H | -7.91280700 | 2.91183800  | -2.91928700 |
| C | -2.70263200 | 5.99887800  | 1.52426700  |
| H | -3.70796100 | 5.55651700  | 1.50976700  |
| H | -2.61560000 | 6.66838000  | 0.65930200  |
| H | -2.61687600 | 6.61165300  | 2.43123800  |
| C | 6.49791900  | -2.33244100 | -0.42953900 |
| H | 5.96372400  | -1.78756100 | -1.21541300 |
| C | 3.62663700  | 2.15262900  | -4.20269000 |
| H | 2.66160700  | 2.67059800  | -4.25511900 |
| H | 3.73544600  | 1.54181400  | -5.10954900 |
| H | 4.41579800  | 2.90811000  | -4.21827700 |
| C | 4.34512900  | 1.41741500  | 2.42660400  |
| H | 3.88467600  | 1.62631100  | 1.45399400  |
| C | -4.12148100 | -4.53312100 | -0.54792100 |

|   |             |             |             |
|---|-------------|-------------|-------------|
| H | -4.62454100 | -5.13841600 | -1.31327200 |
| H | -3.72718300 | -3.63401500 | -1.03720200 |
| H | -4.87159400 | -4.21249300 | 0.18529700  |
| C | 3.20353900  | 1.18235600  | 3.44810500  |
| H | 3.59436700  | 1.06712200  | 4.46792400  |
| H | 2.63638600  | 0.27760700  | 3.19996300  |
| H | 2.51120500  | 2.03512500  | 3.44957700  |
| C | 2.28075900  | -4.25673200 | -2.69549100 |
| H | 3.31695700  | -3.90209400 | -2.61472800 |
| H | 1.61379300  | -3.38441700 | -2.71426600 |
| H | 2.17545400  | -4.77049200 | -3.66005100 |
| C | 7.99361600  | -2.40365700 | -0.83536600 |
| H | 8.57884700  | -2.97336700 | -0.10145600 |
| H | 8.44106600  | -1.40560400 | -0.91527100 |
| H | 8.10209300  | -2.90259600 | -1.80803300 |
| C | -5.33789600 | -1.67087600 | -3.13957400 |
| H | -6.07723800 | -1.39328900 | -3.90301300 |
| H | -5.86724000 | -2.18445600 | -2.32888200 |
| H | -4.63319300 | -2.38457000 | -3.58752800 |
| C | -8.14330100 | 1.84766700  | 2.05762200  |
| H | -8.76387300 | 2.64102000  | 1.62111700  |
| H | -8.13984200 | 1.99273700  | 3.14643400  |
| H | -8.63071700 | 0.88777100  | 1.84451000  |
| H | -0.88656800 | 4.84921500  | -3.84618900 |
| H | -5.21584200 | -2.79928000 | 2.27875000  |

### **B3LYP-D3/LANL2DZ**

**In<sub>2</sub><sup>OP</sup>**

|    |             |             |             |
|----|-------------|-------------|-------------|
| In | 3.19436800  | -0.36452300 | -1.10563000 |
| In | -3.19434300 | 0.36539700  | 1.10533800  |
| C  | -5.64006800 | 0.16886900  | -2.84451100 |
| H  | -6.44314600 | 0.86343400  | -2.57267900 |
| H  | -6.06155700 | -0.84135500 | -2.77594100 |
| H  | -5.34790200 | 0.35587900  | -3.88112400 |
| C  | 0.31802200  | -0.70864200 | 0.03400500  |
| H  | -0.33722400 | -1.36191400 | 0.62387500  |
| H  | 0.34013800  | -1.12574200 | -0.98198400 |
| C  | -5.99854500 | -3.67426200 | -1.35148300 |
| H  | -6.84714400 | -4.20996900 | -0.90694600 |
| H  | -5.25656700 | -4.42219900 | -1.66092900 |
| H  | -6.36148700 | -3.15909400 | -2.25008100 |
| C  | 4.86375100  | 3.42285600  | -0.91475000 |
| H  | 5.69667900  | 3.90630000  | -1.44220100 |
| H  | 4.13651200  | 4.19928300  | -0.64079600 |
| H  | 4.38321300  | 2.72937300  | -1.61753800 |
| C  | 6.33836000  | 1.55643800  | -0.03886900 |
| C  | -3.19958900 | 0.60371900  | -2.48947100 |

|   |             |             |             |
|---|-------------|-------------|-------------|
| H | -3.21330200 | 0.71120300  | -3.56812800 |
| C | 5.36924600  | 2.67700200  | 0.34820200  |
| H | 4.49817800  | 2.22487400  | 0.83497400  |
| C | -8.50488700 | -0.87705300 | 0.95807200  |
| H | -9.47541300 | -1.14381200 | 1.36974000  |
| N | -4.65408700 | 0.16392600  | -0.56635400 |
| C | 6.39338700  | -2.97696400 | -1.55640900 |
| H | 5.63842800  | -2.45634000 | -2.15969900 |
| H | 6.09743400  | -4.03078600 | -1.46469000 |
| H | 7.34443200  | -2.93640800 | -2.10369100 |
| C | -7.60156900 | -1.88099500 | 0.57467700  |
| H | -7.87992000 | -2.92568900 | 0.69326800  |
| C | 7.60242800  | 1.88056800  | -0.57281200 |
| H | 7.88117700  | 2.92524800  | -0.69057600 |
| N | -1.70773000 | 0.65217800  | -0.55130800 |
| N | 4.65402000  | -0.16413400 | 0.56624700  |
| C | -6.33772700 | -1.55680800 | 0.04022900  |
| C | -4.45138100 | 0.31921200  | -1.89895400 |
| C | 5.99963000  | 3.67344300  | 1.35372300  |
| H | 6.84827600  | 4.20924700  | 0.90939300  |
| H | 6.36254600  | 3.15784700  | 2.25208800  |
| H | 5.25776100  | 4.42134200  | 1.66351900  |
| N | 1.70753000  | -0.65188300 | 0.55069700  |
| C | -8.14823200 | 0.47241400  | 0.81133900  |
| H | -8.84949200 | 1.24754300  | 1.11206300  |
| C | -6.39378300 | 2.97765800  | 1.55435100  |
| H | -7.34455800 | 2.93708800  | 2.10210200  |
| H | -6.09831000 | 4.03153800  | 1.46175800  |
| H | -5.63833700 | 2.45776700  | 2.15766500  |
| C | 8.50547000  | 0.87658200  | -0.95675600 |
| H | 9.47618900  | 1.14329600  | -1.36799700 |
| C | 6.89381200  | -0.84184400 | -0.28240800 |
| C | -5.98741300 | -0.18507100 | -0.10035200 |
| C | -1.92222800 | 0.73936600  | -1.88260000 |
| C | 5.98752200  | 0.18472600  | 0.10063400  |
| C | 1.92182500  | -0.73930300 | 1.88200400  |
| C | 5.63970400  | -0.17017200 | 2.84455000  |
| H | 6.44298400  | -0.86425400 | 2.57210200  |
| H | 5.34750600  | -0.35824700 | 3.88096000  |
| H | 6.06092800  | 0.84023500  | 2.77698400  |
| C | 0.76070500  | -1.02214400 | 2.83898600  |
| H | -0.05333100 | -0.29546900 | 2.73185700  |
| H | 1.10116700  | -0.99427700 | 3.87701000  |
| H | 0.33483400  | -2.01739300 | 2.65141200  |
| C | 4.45110300  | -0.31986400 | 1.89877500  |
| C | 8.14828200  | -0.47285800 | -0.81112700 |
| H | 8.84932000  | -1.24802000 | -1.11228500 |
| C | 3.19914600  | -0.60412700 | 2.48906300  |

|   |             |             |             |
|---|-------------|-------------|-------------|
| C | -6.89401500 | 0.84146300  | 0.28207500  |
| C | -0.31814900 | 0.70904500  | -0.03480700 |
| H | -0.34017100 | 1.12617500  | 0.98117100  |
| H | 0.33701300  | 1.36231500  | -0.62477600 |
| C | 6.53458500  | -2.32478500 | -0.15576000 |
| H | 5.56307000  | -2.40156400 | 0.34495500  |
| C | 7.56509000  | -3.10008200 | 0.70437100  |
| H | 7.24696300  | -4.14342000 | 0.83115900  |
| H | 7.67388000  | -2.65168700 | 1.70021600  |
| H | 8.55558500  | -3.10771300 | 0.23137300  |
| C | -6.53536200 | 2.32444000  | 0.15422300  |
| H | -5.56408500 | 2.40121600  | -0.34695300 |
| C | -0.76132100 | 1.02243400  | -2.83977400 |
| H | 0.05275900  | 0.29575900  | -2.73294400 |
| H | -0.33543100 | 2.01765100  | -2.65209700 |
| H | -1.10199800 | 0.99474500  | -3.87773200 |
| C | -5.36833600 | -2.67729800 | -0.34635100 |
| H | -4.49739300 | -2.22514700 | -0.83332700 |
| C | -4.86262600 | -3.42256700 | 0.91684900  |
| H | -5.69541200 | -3.90594900 | 1.44457900  |
| H | -4.38213400 | -2.72872800 | 1.61931900  |
| H | -4.13529000 | -4.19898300 | 0.64312500  |
| C | -7.56652800 | 3.09877700  | -0.70598100 |
| H | -8.55676200 | 3.10655100  | -0.23243900 |
| H | -7.67577600 | 2.64954700  | -1.70139900 |
| H | -7.24873400 | 4.14209200  | -0.83379000 |
| H | 3.21269200  | -0.71184500 | 3.56769800  |

### **ln<sub>2</sub><sup>dim</sup>**

|    |             |             |             |
|----|-------------|-------------|-------------|
| ln | -1.16859200 | 0.60519700  | -0.83594200 |
| ln | 2.18285100  | 1.36417800  | -1.29201000 |
| C  | 2.68702600  | -1.07569300 | 2.63836100  |
| H  | 3.78133400  | -1.12572700 | 2.66595000  |
| H  | 2.33277200  | -2.05990600 | 2.31194700  |
| H  | 2.31852500  | -0.89034500 | 3.65026200  |
| C  | -0.64461200 | 3.62552100  | -1.12483200 |
| H  | -1.03312500 | 4.60467400  | -1.43349400 |
| H  | -0.27089700 | 3.13924500  | -2.03584200 |
| C  | 0.91460400  | -3.79608900 | 0.18396300  |
| H  | 1.28303700  | -4.71927400 | -0.28227000 |
| H  | -0.18257800 | -3.83677100 | 0.19898500  |
| H  | 1.26813000  | -3.78057000 | 1.22275400  |
| C  | -0.72142600 | -1.80996800 | 2.78389700  |
| H  | -0.71465500 | -2.88878700 | 2.98610900  |
| H  | -0.20938200 | -1.30286400 | 3.61067200  |
| H  | -0.14452100 | -1.63126400 | 1.87206900  |
| C  | -2.87706400 | -1.94814300 | 1.45650900  |
| C  | 1.39476100  | 1.02530500  | 2.21221600  |

|   |             |             |             |
|---|-------------|-------------|-------------|
| H | 1.13120900  | 0.88660500  | 3.25444900  |
| C | -2.16656300 | -1.27640300 | 2.63449500  |
| H | -2.10082900 | -0.20115600 | 2.43280700  |
| C | 5.15507700  | -3.22213300 | -0.94817900 |
| H | 5.79922000  | -4.02260300 | -1.30475400 |
| N | 2.62696700  | -0.04637500 | 0.38384500  |
| C | -3.68254100 | -1.50161300 | -3.24510700 |
| H | -2.60851200 | -1.32783100 | -3.10068000 |
| H | -4.01331200 | -0.91845100 | -4.11502300 |
| H | -3.82098200 | -2.56595800 | -3.47621100 |
| C | 3.75996000  | -3.37290500 | -0.97802800 |
| H | 3.32795500  | -4.29484900 | -1.36054400 |
| C | -3.06995000 | -3.34527600 | 1.47390400  |
| H | -2.71726400 | -3.92153900 | 2.32615000  |
| N | 1.13125000  | 2.58375900  | 0.34403600  |
| N | -3.06019500 | 0.21373200  | 0.24009400  |
| C | 2.90480900  | -2.34736700 | -0.52424300 |
| C | 2.22631300  | 0.01404300  | 1.67277200  |
| C | -2.95019900 | -1.46488100 | 3.95946200  |
| H | -3.00573500 | -2.52551400 | 4.23764600  |
| H | -3.97698500 | -1.08673500 | 3.88125500  |
| H | -2.45044600 | -0.92881600 | 4.77742200  |
| N | -1.68713700 | 2.74478700  | -0.54275600 |
| C | 5.71458700  | -2.03051700 | -0.46144500 |
| H | 6.79587800  | -1.91381700 | -0.44362500 |
| C | 6.28219600  | 1.05427600  | -0.61969600 |
| H | 7.09828800  | 0.44300500  | -1.02736700 |
| H | 6.71313800  | 1.99498900  | -0.25049900 |
| H | 5.59364200  | 1.28780200  | -1.44144800 |
| C | -3.70320400 | -4.00444300 | 0.40935500  |
| H | -3.83857500 | -5.08299000 | 0.43741300  |
| C | -3.98811500 | -1.86583900 | -0.75185500 |
| C | 3.48511800  | -1.14576100 | -0.02990800 |
| C | 0.89488000  | 2.21747500  | 1.62163300  |
| C | -3.33962500 | -1.20996100 | 0.33203200  |
| C | -2.74012500 | 3.27598800  | 0.11017200  |
| C | -5.22827000 | 0.58030500  | 1.38697100  |
| H | -5.82045600 | 0.01980500  | 0.65318600  |
| H | -5.83974800 | 1.39738300  | 1.77881900  |
| H | -5.00119300 | -0.11390700 | 2.20294800  |
| C | -2.88034600 | 4.79469500  | 0.24201600  |
| H | -1.97592100 | 5.24590500  | 0.66839500  |
| H | -3.72375200 | 5.05080700  | 0.88797300  |
| H | -3.05246200 | 5.26058200  | -0.73754600 |
| C | -3.94837700 | 1.10372900  | 0.74287900  |
| C | -4.15646700 | -3.26474900 | -0.69370400 |
| H | -4.64344500 | -3.77850400 | -1.51929200 |
| C | -3.77994500 | 2.50769800  | 0.70068500  |

|   |             |             |             |
|---|-------------|-------------|-------------|
| C | 4.89771000  | -0.98003800 | 0.00549900  |
| C | 0.57234000  | 3.85543000  | -0.17495100 |
| H | 1.35100100  | 4.35717200  | -0.76848300 |
| H | 0.28635500  | 4.54843100  | 0.62382900  |
| C | -4.48688000 | -1.10025100 | -1.98072700 |
| H | -4.32422200 | -0.03020200 | -1.80996400 |
| C | -6.00535800 | -1.30849100 | -2.21218800 |
| H | -6.34877300 | -0.69948400 | -3.05892900 |
| H | -6.58774600 | -1.02402700 | -1.32632900 |
| H | -6.23422700 | -2.35758500 | -2.43994500 |
| C | 5.54798900  | 0.30604600  | 0.52366800  |
| H | 4.75634700  | 0.96578700  | 0.89598400  |
| C | 0.04199100  | 3.09038000  | 2.54819200  |
| H | -0.96090800 | 3.23786500  | 2.13172300  |
| H | 0.49656200  | 4.07769600  | 2.70425500  |
| H | -0.06556100 | 2.61597900  | 3.52668900  |
| C | 1.38865700  | -2.54392300 | -0.59661100 |
| H | 0.90859800  | -1.66875000 | -0.14623000 |
| C | 0.91036900  | -2.61234300 | -2.06914300 |
| H | 1.35249900  | -3.47474700 | -2.58626800 |
| H | 1.19294700  | -1.70378000 | -2.61482400 |
| H | -0.18312400 | -2.70559000 | -2.11066400 |
| C | 6.51752500  | 0.02804200  | 1.70137800  |
| H | 7.36491900  | -0.59248100 | 1.38194700  |
| H | 6.01111700  | -0.49514100 | 2.52260700  |
| H | 6.92153100  | 0.97110400  | 2.09336700  |
| H | -4.57165300 | 3.08154800  | 1.16905600  |

#### In<sub>4</sub>

|    |             |             |             |
|----|-------------|-------------|-------------|
| In | -1.33279000 | 1.33090800  | -0.34046000 |
| In | 1.27368300  | -1.38496900 | 0.31042200  |
| In | 1.49376000  | 1.66823200  | 0.93611200  |
| In | -1.56182900 | -1.70691000 | -0.97138300 |
| N  | -0.48452200 | 1.66514300  | -2.34906500 |
| C  | -1.30729200 | 5.72355100  | 2.85325500  |
| H  | -1.51970600 | 6.49446000  | 2.10194300  |
| H  | -0.26612600 | 5.84437600  | 3.18127400  |
| H  | -1.95642700 | 5.91293200  | 3.71826200  |
| C  | -0.12384000 | 2.86877800  | -2.82857900 |
| C  | 5.94483700  | 2.66357000  | 1.15055500  |
| H  | 5.88434700  | 3.73371500  | 0.92136300  |
| H  | 6.32903400  | 2.17057500  | 0.25140100  |
| H  | 6.66091200  | 2.51788300  | 1.96332600  |
| C  | -0.55534800 | 4.10509900  | -2.26816000 |
| H  | -0.15294000 | 4.99329500  | -2.74120100 |
| C  | -3.43845100 | -4.21475700 | 1.07425800  |
| N  | -2.32682300 | -0.88284200 | -2.90109600 |
| C  | -0.05188300 | -0.58570900 | 2.96843300  |

|   |             |             |             |
|---|-------------|-------------|-------------|
| H | -0.86728900 | -0.81537100 | 3.66476500  |
| H | -0.49304100 | 0.05116100  | 2.19319800  |
| C | 5.98501900  | 0.32463800  | -2.02044400 |
| H | 6.25168200  | 0.62240200  | -3.04351900 |
| H | 6.13764600  | -0.75816100 | -1.93166900 |
| H | 6.67826900  | 0.82786000  | -1.33489000 |
| C | -1.34691400 | -0.21324000 | -3.80370000 |
| H | -0.95017700 | -0.96338900 | -4.50942800 |
| H | -1.81980900 | 0.57859100  | -4.39777000 |
| C | -3.02046600 | -5.16169400 | -0.05553400 |
| H | -3.07889500 | -4.61313700 | -1.00235100 |
| N | -2.05023300 | 3.37639600  | -0.47628000 |
| N | -3.60022500 | -2.29154500 | -0.49420200 |
| C | -3.98745700 | -0.53323200 | -4.72682600 |
| H | -3.96710300 | 0.56567600  | -4.72898400 |
| H | -5.00104700 | -0.85044900 | -4.98279200 |
| H | -3.31014100 | -0.87806300 | -5.51805500 |
| C | -3.73703700 | -2.84353000 | 0.83984200  |
| C | -3.16473600 | 3.67829800  | 0.39591700  |
| C | 5.29072200  | -1.54681700 | 1.31386700  |
| H | 6.12208900  | -1.30998300 | 0.63637500  |
| H | 5.59251100  | -1.28311300 | 2.33543200  |
| H | 4.44262900  | -0.90714200 | 1.04949700  |
| C | -1.51780500 | 4.34109900  | -1.26194800 |
| C | -3.83319200 | 0.43424200  | 2.74900800  |
| H | -4.32749600 | 0.30198700  | 3.72136000  |
| H | -3.96815800 | 1.47896100  | 2.44927300  |
| H | -2.76156000 | 0.25373900  | 2.87888200  |
| C | 4.52724300  | -3.41750200 | -0.21587600 |
| C | 4.45128000  | 1.51107000  | 2.79133500  |
| H | 5.36963800  | 1.49226800  | 3.36605400  |
| C | 4.90571300  | -3.04406800 | 1.22032900  |
| H | 4.02713600  | -3.18696300 | 1.85741500  |
| C | 0.79206900  | 2.98244300  | -4.04809100 |
| H | 1.75340800  | 2.49053400  | -3.85688900 |
| H | 1.00135300  | 4.03089200  | -4.27171900 |
| H | 0.34142500  | 2.52680300  | -4.93972100 |
| C | -1.98725500 | 5.77915300  | -1.07243400 |
| H | -1.46938700 | 6.45615400  | -1.75675600 |
| H | -1.80773800 | 6.11239000  | -0.04424200 |
| H | -3.06726600 | 5.85747200  | -1.24973000 |
| C | -4.05245200 | 4.29961200  | 2.57624000  |
| H | -3.89346100 | 4.62086600  | 3.60314700  |
| C | -1.52415900 | 4.29924100  | 2.28504300  |
| H | -0.81007500 | 4.14743200  | 1.46881500  |
| C | 4.15080400  | 4.23026900  | -3.10492200 |
| H | 4.29033600  | 4.73761900  | -4.05690800 |
| C | -2.93834400 | 4.10053800  | 1.73452900  |

|   |             |             |             |
|---|-------------|-------------|-------------|
| C | -3.58156700 | -1.07573700 | -3.35396100 |
| N | 3.56305200  | 2.23753700  | 0.62642100  |
| C | -4.42161500 | -0.49973700 | 1.66806100  |
| H | -3.96356600 | -0.21203700 | 0.71641700  |
| C | 0.99219000  | -3.21953100 | -3.51292800 |
| H | 1.20236100  | -2.18359400 | -3.22552600 |
| H | -0.08144300 | -3.30409200 | -3.72734100 |
| H | 1.54629100  | -3.43426400 | -4.43692100 |
| C | 4.41027500  | 2.85547600  | -2.99413500 |
| H | 4.75306800  | 2.30161800  | -3.86539000 |
| C | 5.53207000  | -3.53253400 | -1.19760400 |
| H | 6.57010800  | -3.35990800 | -0.92281200 |
| C | -5.65081400 | 4.00817500  | -2.28067500 |
| H | -6.65192900 | 4.05633900  | -1.83237900 |
| H | -5.76821500 | 3.70394000  | -3.32963800 |
| H | -5.22582800 | 5.02032200  | -2.26251900 |
| C | -5.35952600 | 4.07686800  | 2.11490100  |
| H | -6.20631200 | 4.22502500  | 2.78092400  |
| N | 2.09338800  | 0.81114600  | 2.92577700  |
| N | 2.12662700  | -3.39332700 | 0.37938000  |
| C | -3.52846400 | -4.70832000 | 2.39274000  |
| H | -3.29936800 | -5.75346900 | 2.58719900  |
| C | 4.23379200  | 2.17442500  | -1.77135300 |
| C | 4.57140300  | 2.11252100  | 1.51970500  |
| C | 6.03742200  | -3.94122700 | 1.77960300  |
| H | 6.98464500  | -3.77690600 | 1.24965400  |
| H | 5.78447700  | -5.00604200 | 1.69156300  |
| H | 6.20880100  | -3.71477300 | 2.84048700  |
| C | -4.64108000 | -2.31522900 | -1.35488100 |
| N | 0.48534200  | -1.79913700 | 2.31091600  |
| C | -1.55196500 | -5.62693200 | 0.12129700  |
| H | -0.87447400 | -4.76903800 | 0.17738200  |
| H | -1.24538200 | -6.26059700 | -0.72249800 |
| H | -1.43062800 | -6.20499900 | 1.04741100  |
| C | 3.70548600  | 4.94551500  | -1.98294200 |
| H | 3.49996800  | 6.00987900  | -2.07251400 |
| C | -4.09974400 | -1.97707500 | 1.91167000  |
| C | 1.65181900  | 5.73796900  | 0.22633100  |
| H | 1.66731400  | 6.46637500  | -0.59623900 |
| H | 1.29647400  | 6.25315900  | 1.12922800  |
| H | 0.93581900  | 4.95315000  | -0.03534300 |
| C | -5.56868900 | 3.65181900  | 0.79274700  |
| H | -6.58243600 | 3.47605800  | 0.43939500  |
| C | 5.21601400  | -3.87281800 | -2.52315600 |
| H | 6.00454600  | -3.96100900 | -3.26688700 |
| C | 2.83806200  | -3.96912800 | -1.93725800 |
| C | 3.79766800  | 2.91495200  | -0.63646800 |
| C | 3.33486700  | 0.90392800  | 3.43877000  |



|   |             |             |             |
|---|-------------|-------------|-------------|
| C | 3.17056900  | -3.62651400 | -0.59830200 |
| C | -4.19175600 | -2.51931500 | 3.21053400  |
| H | -4.48294800 | -1.87588800 | 4.03669400  |
| C | 0.39468900  | -2.99792600 | 2.90935400  |
| C | -4.48468800 | 3.45380500  | -0.08680500 |
| C | -5.92573200 | -3.03571300 | -0.95196300 |
| H | -5.80920400 | -4.11215000 | -1.13584500 |
| H | -6.77681600 | -2.68086900 | -1.54027800 |
| H | -6.14994100 | -2.91536500 | 0.11067300  |
| C | 2.38899700  | -5.76246100 | 1.05320200  |
| H | 2.22913400  | -6.10894500 | 0.02638700  |
| H | 1.94544000  | -6.48442500 | 1.74409500  |
| H | 3.47378300  | -5.74377900 | 1.21808000  |
| C | -4.74112700 | 3.00442500  | -1.52828700 |
| H | -3.77903100 | 2.97475100  | -2.05005900 |
| C | -4.61735800 | -1.75869900 | -2.65385900 |
| C | -0.35343100 | -3.14623200 | 4.23417800  |
| H | 0.04808200  | -2.47565900 | 5.00454700  |
| H | -0.27931000 | -4.17147700 | 4.60548300  |
| H | -1.41739400 | -2.91448600 | 4.10110400  |
| C | 1.79413400  | -4.37233500 | 1.25542800  |
| C | -0.13816200 | 0.42714000  | -3.08377300 |
| H | 0.63526700  | 0.59105000  | -3.84164100 |
| H | 0.28700300  | -0.29151200 | -2.37322000 |
| C | 3.87827400  | -4.09489900 | -2.88253300 |
| H | 3.63523200  | -4.36162800 | -3.90860000 |
| C | 0.95554000  | -4.19467800 | 2.37725300  |
| C | 3.52609000  | 4.30981700  | -0.73697200 |
| C | 1.01483800  | 0.20928100  | 3.76007600  |
| H | 0.49066700  | 1.01864100  | 4.29443400  |
| H | 1.42135500  | -0.47091600 | 4.51602600  |
| C | 1.38996900  | -4.19437700 | -2.37615400 |
| H | 0.73417300  | -3.98430000 | -1.52487600 |
| C | -3.91293200 | -3.87477800 | 3.45362600  |
| H | -3.98930500 | -4.27514200 | 4.46221900  |
| C | 1.14064700  | -5.66082500 | -2.80961000 |
| H | 0.08618200  | -5.80072600 | -3.08394100 |
| H | 1.37583300  | -6.36261100 | -1.99983200 |
| H | 1.75734200  | -5.92986900 | -3.67767500 |
| C | 3.05963600  | 5.13614800  | 0.46619300  |
| H | 2.98931100  | 4.47003300  | 1.33297000  |
| C | 3.64521600  | 0.32831100  | 4.82489200  |
| H | 3.51709900  | -0.76286400 | 4.83339000  |
| H | 2.98718400  | 0.74811600  | 5.59604900  |
| H | 4.67796200  | 0.54563700  | 5.10727000  |
| C | 4.50720700  | 0.66962400  | -1.70481500 |
| H | 4.29146500  | 0.32926700  | -0.68910200 |
| C | -5.33441700 | 1.57475100  | -1.57780700 |

|   |             |             |             |
|---|-------------|-------------|-------------|
| H | -6.28764100 | 1.52014300  | -1.03604900 |
| H | -4.64970900 | 0.84485800  | -1.13376600 |
| H | -5.51460800 | 1.26640600  | -2.61586200 |
| C | 3.57003800  | -0.11445600 | -2.65592000 |
| H | 3.74766100  | 0.15633500  | -3.70649900 |
| H | 2.52517400  | 0.09298300  | -2.41086500 |
| H | 3.73508300  | -1.19324900 | -2.54887900 |
| C | -1.20446000 | 3.23533100  | 3.36581400  |
| H | -0.16313200 | 3.33611700  | 3.70031300  |
| H | -1.33675800 | 2.22524600  | 2.96385200  |
| H | -1.86537100 | 3.34464600  | 4.23677600  |
| C | 4.07637500  | 6.25319600  | 0.81778100  |
| H | 4.17231700  | 6.97434700  | -0.00455800 |
| H | 5.07333000  | 5.84159100  | 1.02007500  |
| H | 3.74586500  | 6.80227800  | 1.70979900  |
| C | -5.95073200 | -0.26415900 | 1.54749300  |
| H | -6.46904100 | -0.61042700 | 2.45240200  |
| H | -6.37362500 | -0.79091900 | 0.68541800  |
| H | -6.15146200 | 0.80690700  | 1.42182000  |
| C | -3.96957100 | -6.38267000 | -0.16108700 |
| H | -3.90391100 | -7.01588000 | 0.73334200  |
| H | -3.69997400 | -7.00084900 | -1.02795000 |
| H | -5.01578100 | -6.07049300 | -0.27107900 |
| H | 0.75121900  | -5.09395000 | 2.94692100  |
| H | -5.55074700 | -1.84703500 | -3.19810500 |

## Tl<sub>2</sub><sup>op</sup>

|   |             |             |             |
|---|-------------|-------------|-------------|
| C | 5.56484600  | -0.05690800 | 3.07213900  |
| H | 6.36193800  | 0.67855800  | 2.90767800  |
| H | 6.01825800  | -1.04737000 | 2.94072600  |
| H | 5.21277000  | 0.03273600  | 4.10321400  |
| C | -0.30924200 | -0.70478800 | -0.11684800 |
| H | 0.37696300  | -1.28615800 | -0.74884700 |
| H | -0.34079700 | -1.22525500 | 0.85159700  |
| C | 6.01051600  | -3.80047400 | 1.27820300  |
| H | 6.87779100  | -4.30043300 | 0.82743500  |
| H | 5.26273500  | -4.57068800 | 1.51023300  |
| H | 6.33895800  | -3.34625900 | 2.22174100  |
| C | -4.93761500 | 3.39213500  | 0.99785700  |
| H | -5.78120100 | 3.84063500  | 1.53898500  |
| H | -4.20185700 | 4.18274400  | 0.79739000  |
| H | -4.47490500 | 2.65135100  | 1.66472100  |
| C | -6.39454800 | 1.59635500  | -0.04764500 |
| C | 3.14321200  | 0.40022400  | 2.61688900  |
| H | 3.11555300  | 0.43259000  | 3.70091100  |
| C | -5.41123200 | 2.73590200  | -0.32544200 |
| H | -4.52940800 | 2.31014300  | -0.81592500 |
| C | 8.57394800  | -0.84819700 | -0.78539400 |

|   |             |             |             |
|---|-------------|-------------|-------------|
| H | 9.54752900  | -1.08166800 | -1.20992000 |
| N | 4.70813800  | 0.07088400  | 0.75387000  |
| C | -6.44020500 | -3.04410000 | 1.05314800  |
| H | -5.68473100 | -2.57376500 | 1.69728200  |
| H | -6.13666500 | -4.08357900 | 0.86909000  |
| H | -7.38611700 | -3.05828400 | 1.61066000  |
| C | 7.66199500  | -1.87786200 | -0.50142100 |
| H | 7.93721100  | -2.90957800 | -0.71007900 |
| C | -7.66198900 | 1.87788000  | 0.50141200  |
| H | -7.93720300 | 2.90960200  | 0.71004700  |
| N | 1.68282600  | 0.60730000  | 0.65385900  |
| N | -4.70814500 | -0.07089100 | -0.75387000 |
| C | 6.39454700  | -1.59634900 | 0.04762400  |
| C | 4.42566700  | 0.14944500  | 2.07150900  |
| C | -6.01054100 | 3.80044500  | -1.27829400 |
| H | -6.87781100 | 4.30041500  | -0.82752700 |
| H | -6.33899500 | 3.34620200  | -2.22181300 |
| H | -5.26276500 | 4.57065500  | -1.51035700 |
| N | -1.68283500 | -0.60732100 | -0.65388200 |
| C | 8.22015900  | 0.48494900  | -0.52110400 |
| H | 8.92692100  | 1.28113500  | -0.74487000 |
| C | 6.44025600  | 3.04414900  | -1.05303200 |
| H | 7.38618600  | 3.05835000  | -1.61051300 |
| H | 6.13671400  | 4.08362200  | -0.86894600 |
| H | 5.68480100  | 2.57384000  | -1.69720800 |
| C | -8.57393400 | 0.84822200  | 0.78542700  |
| H | -9.54750900 | 1.08170200  | 1.20996200  |
| C | -6.96333600 | -0.80977400 | -0.02894000 |
| C | 6.04469400  | -0.24099500 | 0.31061000  |
| C | 1.88001400  | 0.58714200  | 1.98436600  |
| C | -6.04469600 | 0.24099600  | -0.31060100 |
| C | -1.88003400 | -0.58716900 | -1.98438700 |
| C | -5.56487300 | 0.05688000  | -3.07213400 |
| H | -6.36196400 | -0.67858500 | -2.90766400 |
| H | -5.21280400 | -0.03277000 | -4.10321100 |
| H | -6.01828400 | 1.04734200  | -2.94072300 |
| C | -0.69825600 | -0.79218500 | -2.94492300 |
| H | 0.09796200  | -0.05633400 | -2.77430300 |
| H | -1.02290300 | -0.69861100 | -3.98411900 |
| H | -0.25738600 | -1.79065800 | -2.81814200 |
| C | -4.42568700 | -0.14946800 | -2.07151100 |
| C | -8.22014600 | -0.48493100 | 0.52116800  |
| H | -8.92690300 | -1.28111300 | 0.74496800  |
| C | -3.14323700 | -0.40025500 | -2.61690100 |
| C | 6.96334100  | 0.80978000  | 0.02899200  |
| C | 0.30923800  | 0.70476800  | 0.11681600  |
| H | 0.34079700  | 1.22523300  | -0.85162900 |
| H | -0.37697100 | 1.28613900  | 0.74881200  |

|    |             |             |             |
|----|-------------|-------------|-------------|
| C  | -6.59684400 | -2.27340500 | -0.28416700 |
| H  | -5.62786200 | -2.29656900 | -0.79439400 |
| C  | -7.62792900 | -2.98101000 | -1.19921900 |
| H  | -7.30327400 | -4.00677700 | -1.41962800 |
| H  | -7.74747800 | -2.44717200 | -2.15054000 |
| H  | -8.61489700 | -3.03777100 | -0.72187300 |
| C  | 6.59684900  | 2.27340400  | 0.28426000  |
| H  | 5.62785100  | 2.29655500  | 0.79445800  |
| C  | 0.69822700  | 0.79214800  | 2.94489200  |
| H  | -0.09798900 | 0.05629700  | 2.77425700  |
| H  | 0.25735800  | 1.79062200  | 2.81811500  |
| H  | 1.02286400  | 0.69856500  | 3.98409100  |
| C  | 5.41122400  | -2.73590100 | 0.32537400  |
| H  | 4.52939300  | -2.31015400 | 0.81585600  |
| C  | 4.93762500  | -3.39209500 | -0.99795100 |
| H  | 5.78121800  | -3.84058000 | -1.53908000 |
| H  | 4.47492600  | -2.65129000 | -1.66480100 |
| H  | 4.20186200  | -4.18270700 | -0.79751800 |
| C  | 7.62790800  | 2.98097000  | 1.19937100  |
| H  | 8.61489200  | 3.03774200  | 0.72205900  |
| H  | 7.74742300  | 2.44709600  | 2.15067600  |
| H  | 7.30325200  | 4.00673100  | 1.41980600  |
| H  | -3.11558800 | -0.43263100 | -3.70092300 |
| TI | -3.29175900 | -0.38584900 | 1.21481200  |
| TI | 3.29176800  | 0.38585800  | -1.21482300 |

### TI<sub>2</sub><sup>dim</sup>

|    |             |             |             |
|----|-------------|-------------|-------------|
| TI | -1.00285200 | -0.42805800 | -0.67642600 |
| TI | 2.35318400  | -1.35621800 | -1.08410800 |
| N  | 2.45981300  | 0.40146100  | 0.63032300  |
| N  | 1.08819600  | -2.41350600 | 0.84475100  |
| N  | -3.25019200 | -0.19423200 | 0.34530300  |
| C  | 1.14072700  | -0.56583500 | 2.46768100  |
| N  | -1.66557000 | -2.80930100 | -0.17779400 |
| C  | 1.96041600  | 0.43144500  | 1.88347900  |
| C  | -3.83955500 | -2.50946600 | 0.92438900  |
| H  | -4.63252000 | -3.08091100 | 1.39561900  |
| C  | -3.61841600 | 1.19709100  | 0.27820200  |
| C  | -4.09292100 | -1.11601900 | 0.85152400  |
| C  | -4.21764500 | 1.70666600  | -0.91123600 |
| C  | -2.74222500 | -3.29457700 | 0.46057700  |
| C  | 5.37279600  | 0.17427100  | 0.91875000  |
| H  | 4.58479800  | -0.48914700 | 1.29222600  |
| C  | -4.12856100 | 3.96654700  | 0.03250200  |
| H  | -4.32691400 | 5.03177700  | -0.06016200 |
| C  | -3.52808300 | 3.45775400  | 1.19507800  |
| H  | -3.26044000 | 4.13868700  | 2.00032600  |
| C  | 1.17359000  | 2.75374100  | -0.60292500 |

|   |             |             |             |
|---|-------------|-------------|-------------|
| H | 0.71720000  | 1.91961100  | -0.06067200 |
| C | 6.23698900  | 0.59971600  | 2.13380500  |
| H | 6.66982100  | -0.28226900 | 2.62469300  |
| H | 5.63829300  | 1.14433000  | 2.87454800  |
| H | 7.06291400  | 1.25333300  | 1.82437900  |
| C | 3.28710100  | 1.48920400  | 0.16047700  |
| C | 3.52753700  | 3.62841300  | -0.98960200 |
| H | 3.07999400  | 4.49640200  | -1.46899500 |
| C | -5.44674300 | -0.64332100 | 1.38752700  |
| H | -5.31376000 | 0.11735400  | 2.16544800  |
| H | -6.02638400 | -1.47261600 | 1.80184000  |
| H | -6.03098900 | -0.17469900 | 0.58551200  |
| C | 6.22669100  | -0.62816600 | -0.09734500 |
| H | 7.05681900  | -0.02098700 | -0.48157000 |
| H | 5.62506400  | -0.94675600 | -0.95938700 |
| H | 6.65215500  | -1.52331000 | 0.37628500  |
| C | 0.73569900  | -1.86071900 | 2.02000300  |
| C | 4.70471200  | 1.37964800  | 0.25163900  |
| C | 0.59004900  | -3.75977000 | 0.48071200  |
| H | 0.24709700  | -4.33947500 | 1.34608700  |
| H | 1.42060200  | -4.32555800 | 0.02967300  |
| C | 2.69116800  | 2.62291900  | -0.46423400 |
| C | -3.26228200 | 2.08018000  | 1.33751100  |
| C | -0.56008100 | -3.70482500 | -0.57561400 |
| H | -0.13670100 | -3.32133600 | -1.51706900 |
| H | -0.87414400 | -4.73825900 | -0.78501100 |
| C | 4.92566900  | 3.52901200  | -0.90450700 |
| H | 5.55606000  | 4.31443100  | -1.31477400 |
| C | -2.86343800 | -4.80159800 | 0.73618100  |
| H | -2.93063300 | -5.37051100 | -0.20124300 |
| H | -3.75829100 | -5.01844000 | 1.32481700  |
| H | -1.99392000 | -5.17890800 | 1.29019000  |
| C | -4.46384900 | 3.09096400  | -1.01280500 |
| H | -4.92029700 | 3.48720000  | -1.91743100 |
| C | 2.28875000  | 1.63679100  | 2.76729900  |
| H | 3.37470200  | 1.74861100  | 2.86903900  |
| H | 1.85246400  | 1.53240300  | 3.76330600  |
| H | 1.91584000  | 2.56411900  | 2.31826600  |
| C | -3.72568100 | 1.13219200  | -3.33665500 |
| H | -3.94005900 | 2.14995000  | -3.68858100 |
| H | -3.94722700 | 0.43523600  | -4.15627000 |
| H | -2.65030900 | 1.07742600  | -3.11998000 |
| C | 5.50422100  | 2.40816100  | -0.28850900 |
| H | 6.58764400  | 2.33247800  | -0.22337300 |
| C | -1.16999800 | 2.20441300  | 2.76181600  |
| H | -0.54048300 | 1.97852500  | 1.89502100  |
| H | -0.66626300 | 1.80867500  | 3.65232300  |
| H | -1.23428400 | 3.29599000  | 2.86086300  |

|   |             |             |             |
|---|-------------|-------------|-------------|
| C | -4.57084400 | 0.78657800  | -2.08227200 |
| H | -4.32901700 | -0.24136100 | -1.79160500 |
| C | -0.16449000 | -2.61600400 | 3.00815400  |
| H | -1.12870700 | -2.85908300 | 2.54829600  |
| H | -0.35805000 | -2.00547600 | 3.89353000  |
| H | 0.30222000  | -3.55203700 | 3.34313300  |
| C | -2.57432800 | 1.57165800  | 2.60622100  |
| H | -2.44031800 | 0.48821700  | 2.51112700  |
| C | 0.62016000  | 4.06376000  | 0.01132200  |
| H | 0.92749000  | 4.17600400  | 1.05840100  |
| H | -0.47749500 | 4.06158200  | -0.02268500 |
| H | 0.97582500  | 4.94437500  | -0.53940600 |
| C | 0.74532800  | 2.63288200  | -2.08766000 |
| H | 1.17166100  | 3.44967200  | -2.68467100 |
| H | -0.34878400 | 2.67557300  | -2.17785100 |
| H | 1.08859100  | 1.68447700  | -2.52206800 |
| C | -3.43032400 | 1.83804100  | 3.87083200  |
| H | -3.56758700 | 2.91501300  | 4.03605200  |
| H | -2.93954800 | 1.42087400  | 4.76062900  |
| H | -4.42527800 | 1.38404900  | 3.78513700  |
| C | -6.08267900 | 0.83753600  | -2.41995900 |
| H | -6.69359100 | 0.58533500  | -1.54413700 |
| H | -6.32141200 | 0.12512500  | -3.22108000 |
| H | -6.38135700 | 1.83817000  | -2.75940100 |
| H | 0.78808500  | -0.31416300 | 3.46174400  |

#### Tl<sub>4</sub>

|    |             |             |             |
|----|-------------|-------------|-------------|
| Tl | -1.97272500 | 0.78070900  | -0.34974200 |
| Tl | 1.97291200  | -0.78332700 | 0.35057000  |
| Tl | 0.83190000  | 2.49511600  | 0.88102700  |
| Tl | -0.83255600 | -2.49394700 | -0.88370300 |
| N  | -0.59853100 | 1.70814400  | -2.20733000 |
| C  | -2.58848800 | 5.48693300  | 2.86689600  |
| H  | -2.98205900 | 6.24179100  | 2.17552600  |
| H  | -1.58137500 | 5.79531000  | 3.17899400  |
| H  | -3.22700600 | 5.48869700  | 3.75981100  |
| C  | -0.41629000 | 2.99153300  | -2.55998100 |
| C  | 5.77461800  | 2.81717800  | 1.34275100  |
| H  | 5.90785800  | 3.38198900  | 0.41807600  |
| H  | 6.51199300  | 2.00686500  | 1.36921300  |
| H  | 5.99069400  | 3.48405200  | 2.18774800  |
| C  | -1.17224600 | 4.08554300  | -2.04075100 |
| H  | -0.87285900 | 5.05542900  | -2.42497900 |
| C  | -3.35343600 | -4.66067200 | 0.77799400  |
| N  | -1.77500900 | -0.98484700 | -2.89772700 |
| C  | -0.18072600 | -0.62939800 | 2.83657700  |
| H  | -0.99574000 | -0.98197200 | 3.48130200  |
| H  | -0.66370200 | -0.04312300 | 2.03946000  |

|   |             |             |             |
|---|-------------|-------------|-------------|
| C | 6.29773700  | 0.98675300  | -1.71782700 |
| H | 6.62863900  | 1.30235700  | -2.71628400 |
| H | 6.59930900  | -0.05787000 | -1.57396400 |
| H | 6.81981700  | 1.60636300  | -0.98104500 |
| C | -0.69593900 | -0.33674000 | -3.67852900 |
| H | -0.02854300 | -1.12750400 | -4.05497900 |
| H | -1.05815400 | 0.21718500  | -4.55239500 |
| C | -2.82512600 | -5.49545900 | -0.39176100 |
| H | -2.62569700 | -4.81856800 | -1.23152600 |
| N | -2.85373200 | 3.06683900  | -0.56604200 |
| N | -3.39429500 | -2.61227900 | -0.61576800 |
| C | -3.43307500 | 0.21416200  | -4.34611000 |
| H | -3.00968400 | 1.20398400  | -4.13104600 |
| H | -4.51815900 | 0.32128900  | -4.41937500 |
| H | -3.05857700 | -0.10892700 | -5.32631600 |
| C | -3.71165200 | -3.28773000 | 0.61467200  |
| C | -4.00833600 | 3.18627500  | 0.28085500  |
| C | 6.56531500  | -1.17122200 | 1.81843800  |
| H | 7.53334600  | -1.68493100 | 1.74720400  |
| H | 6.50901200  | -0.71296400 | 2.81293500  |
| H | 6.54087100  | -0.36795300 | 1.07269100  |
| C | -2.30216800 | 4.12937700  | -1.18243000 |
| C | -4.07099500 | -0.19831200 | 2.62774100  |
| H | -4.37313500 | -0.46564300 | 3.64922300  |
| H | -4.35022500 | 0.84837000  | 2.45664000  |
| H | -2.98111500 | -0.28118300 | 2.56872200  |
| C | 5.26235200  | -2.68802200 | 0.19977800  |
| C | 4.18617600  | 1.41023100  | 2.61771100  |
| H | 5.12468800  | 1.20582300  | 3.12428600  |
| C | 5.38449700  | -2.14661300 | 1.62802900  |
| H | 4.46446400  | -1.59301700 | 1.85712900  |
| C | 0.67816700  | 3.37811100  | -3.56135300 |
| H | 1.67160300  | 3.08807300  | -3.19746100 |
| H | 0.69415000  | 4.45853100  | -3.72103100 |
| H | 0.52116800  | 2.89408800  | -4.53457600 |
| C | -2.89684500 | 5.52257500  | -0.94911900 |
| H | -2.66403600 | 6.19390300  | -1.78061100 |
| H | -2.47870300 | 5.96166000  | -0.03424600 |
| H | -3.98299500 | 5.47834700  | -0.82057100 |
| C | -5.03103100 | 3.67443400  | 2.44540600  |
| H | -4.94632400 | 4.03410100  | 3.46836000  |
| C | -2.54057400 | 4.08719700  | 2.20636100  |
| H | -1.80929800 | 4.13035500  | 1.39286600  |
| C | 4.13144700  | 4.58408700  | -3.10174000 |
| H | 4.28976800  | 5.07836400  | -4.05716400 |
| C | -3.88836600 | 3.66111500  | 1.61918700  |
| C | -3.06224900 | -0.77808800 | -3.23006900 |
| N | 3.39287200  | 2.61426700  | 0.61522900  |

|   |             |             |             |
|---|-------------|-------------|-------------|
| C | -4.75762700 | -1.11307800 | 1.58353100  |
| H | -4.48414800 | -0.74308100 | 0.59019300  |
| C | 2.04523600  | -3.03067000 | -3.22431700 |
| H | 1.96186700  | -2.03991500 | -2.76174700 |
| H | 1.06194200  | -3.31117800 | -3.62711500 |
| H | 2.74528900  | -2.94179800 | -4.06506700 |
| C | 4.49799000  | 3.24008100  | -2.93056500 |
| H | 4.94885500  | 2.70068300  | -3.76071800 |
| C | 6.37723200  | -2.72254400 | -0.66127800 |
| H | 7.33703100  | -2.35314600 | -0.31402000 |
| C | -5.47563700 | 3.30671700  | -2.65304600 |
| H | -6.35869400 | 3.92862100  | -2.45266500 |
| H | -5.56082300 | 2.90660500  | -3.67268800 |
| H | -4.58640900 | 3.94288300  | -2.61561700 |
| C | -6.27102900 | 3.22103900  | 1.97454600  |
| H | -7.14371500 | 3.23832600  | 2.62297900  |
| N | 1.77408800  | 0.98478700  | 2.89643400  |
| N | 2.85537900  | -3.06809900 | 0.56831300  |
| C | -3.56628700 | -5.28430700 | 2.02394200  |
| H | -3.29885500 | -6.33116300 | 2.14826100  |
| C | 4.30012000  | 2.57197800  | -1.70438900 |
| C | 4.34834800  | 2.26562300  | 1.49625200  |
| C | 5.47703300  | -3.30555500 | 2.65615300  |
| H | 6.36103000  | -3.92634300 | 2.45645700  |
| H | 4.58868200  | -3.94293300 | 2.61830100  |
| H | 5.56105900  | -2.90509500 | 3.67575400  |
| C | -4.34974600 | -2.26293000 | -1.49650200 |
| N | 0.59843900  | -1.70968700 | 2.20725900  |
| C | -1.51241100 | -6.24418600 | -0.04860300 |
| H | -0.74905900 | -5.56066300 | 0.34490600  |
| H | -1.11062000 | -6.73885200 | -0.94388100 |
| H | -1.68287200 | -7.02025700 | 0.70929900  |
| C | 3.56478500  | 5.28428900  | -2.02653000 |
| H | 3.29709300  | 6.33096900  | -2.15176900 |
| C | -4.30088700 | -2.57150000 | 1.70417700  |
| C | 1.51075500  | 6.24615600  | 0.04461100  |
| H | 1.68177500  | 7.02155600  | -0.71384800 |
| H | 1.10874600  | 6.74165500  | 0.93933300  |
| H | 0.74732200  | 5.56260800  | -0.34869300 |
| C | -6.37555800 | 2.72330200  | 0.66449100  |
| H | -7.33572000 | 2.35470800  | 0.31738600  |
| C | 6.27338100  | -3.22065100 | -1.97125900 |
| H | 7.14627700  | -3.23754800 | -2.61942000 |
| C | 3.89081000  | -3.66186300 | -1.61661100 |
| C | 3.71029700  | 3.28885500  | -0.61563200 |
| C | 3.06144700  | 0.78012100  | 3.22969200  |
| C | 4.01023100  | -3.18708500 | -0.27821000 |
| C | -4.49867400 | -3.24056000 | 2.92985000  |



|   |             |             |             |
|---|-------------|-------------|-------------|
| H | -4.94913800 | -2.70172600 | 3.76058700  |
| C | 0.41604100  | -2.99305000 | 2.55991700  |
| C | -5.26092100 | 2.68819200  | -0.19688600 |
| C | -5.77638400 | -2.81350500 | -1.34282300 |
| H | -5.90953400 | -3.37924900 | -0.41869200 |
| H | -5.99354300 | -3.47921300 | -2.18845300 |
| H | -6.51301500 | -2.00248600 | -1.36787500 |
| C | 2.89811000  | -5.52388100 | 0.95100800  |
| H | 2.48058500  | -5.96305400 | 0.03589500  |
| H | 2.66487200  | -6.19521300 | 1.78238100  |
| H | 3.98434300  | -5.47951900 | 0.82314000  |
| C | -5.38406500 | 2.14738200  | -1.62528000 |
| H | -4.46476300 | 1.59277100  | -1.85485000 |
| C | -4.18736400 | -1.40697300 | -2.61759900 |
| C | -0.67902700 | -3.37946100 | 3.56068200  |
| H | -0.52211400 | -2.89587100 | 4.53413500  |
| H | -0.69559500 | -4.45993500 | 3.71994400  |
| H | -1.67217300 | -3.08874600 | 3.19655800  |
| C | 2.30313800  | -4.13073200 | 1.18391700  |
| C | 0.18062900  | 0.62810500  | -2.83722200 |
| H | 0.99554700  | 0.98094500  | -3.48190600 |
| H | 0.66378100  | 0.04162100  | -2.04036700 |
| C | 5.03376900  | -3.67472500 | -2.44245500 |
| H | 4.94955400  | -4.03449700 | -3.46541300 |
| C | 1.17241600  | -4.08701900 | 2.04124300  |
| C | 3.35179800  | 4.66161300  | -0.78012700 |
| C | 0.69570400  | 0.33584200  | 3.67755300  |
| H | 0.02804400  | 1.12614600  | 4.05442700  |
| H | 1.05852000  | -0.21807900 | 4.55115800  |
| C | 2.54326100  | -4.08798800 | -2.20437900 |
| H | 1.81150800  | -4.13088300 | -1.39129300 |
| C | -4.13251100 | -4.58481900 | 3.09984100  |
| H | -4.29075300 | -5.07980700 | 4.05491000  |
| C | 2.59148000  | -5.48788300 | -2.86457000 |
| H | 1.58456500  | -5.79625000 | -3.17728900 |
| H | 2.98452100  | -6.24261200 | -2.17275800 |
| H | 3.23060500  | -5.48989700 | -3.75704800 |
| C | 2.82309600  | 5.49727000  | 0.38885800  |
| H | 2.62310000  | 4.82096700  | 1.22896300  |
| C | 3.43311800  | -0.21099100 | 4.34654700  |
| H | 3.01120300  | -1.20155100 | 4.13198200  |
| H | 3.05776700  | 0.11220800  | 5.32639100  |
| H | 4.51830900  | -0.31659100 | 4.42036200  |
| C | 4.75722400  | 1.11381900  | -1.58233700 |
| H | 4.48326900  | 0.74441900  | -0.58891400 |
| C | -6.56612200 | 1.17348300  | -1.81561200 |
| H | -7.53351700 | 1.68830300  | -1.74379400 |
| H | -6.54232800 | 0.36991000  | -1.07018800 |

|   |             |             |             |
|---|-------------|-------------|-------------|
| H | -6.51078100 | 0.71558000  | -2.81032600 |
| C | 4.07156000  | 0.19809900  | -2.62633000 |
| H | 4.37371200  | 0.46528300  | -3.64785400 |
| H | 2.98158800  | 0.28009700  | -2.56755600 |
| H | 4.35158700  | -0.84830700 | -2.45478700 |
| C | -2.04184600 | 3.02966200  | 3.22566300  |
| H | -1.05840200 | 3.31018100  | 3.62806300  |
| H | -1.95854200 | 2.03912800  | 2.76261800  |
| H | -2.74146100 | 2.94033000  | 4.06672900  |
| C | 3.91419600  | 6.48825400  | 0.87449100  |
| H | 4.18060500  | 7.19529500  | 0.07774000  |
| H | 4.82473500  | 5.95070300  | 1.16765700  |
| H | 3.55815300  | 7.06464400  | 1.73919000  |
| C | -6.29798500 | -0.98580700 | 1.72009600  |
| H | -6.62830600 | -1.30196700 | 2.71856600  |
| H | -6.82064900 | -1.60494200 | 0.98331500  |
| H | -6.59957500 | 0.05892800  | 1.57704700  |
| C | -3.91623400 | -6.48639100 | -0.87745900 |
| H | -4.18218600 | -7.19387400 | -0.08094700 |
| H | -3.56047500 | -7.06229800 | -1.74259700 |
| H | -4.82698700 | -5.94884400 | -1.16997000 |
| H | 0.87272800  | -5.05696900 | 2.42507400  |
| H | -5.12592600 | -1.20137700 | -3.12359300 |

## 7. References

- [S1] a) D. V. Vitanova, F. Hampel, and K. C. Hultzs, *J. Organomet. Chem.* **2005**, *690*, 5182; b) D. V. Vitanova, F. Hampel, and K. C. Hultzs, *Dalton Trans.* **2005**, 1565.
- [S2] SCALE3ABS, CrysAlisPro, Aglient Technologies Inc., Oxford, GB, **2015**.
- [S3] CrysAlisPro, version 171.38.42b, Agilent Technologies Inc., Oxford, GB, **2015**.
- [S4] G. M. Sheldrick, *Acta Cryst.* **2015**, *A71*, 3.
- [S5] G. M. Sheldrick, *Acta Cryst.* **2015**, *C71*, 3.
- [S6] A. L. Spek, *Acta Cryst.* **2015**, *C71*, 9.
- [S7] Gaussian 09, Revision E.01, M. J. Frisch, G. W. Trucks, H. B. Schlegel, G. E. Scuseria, M. A. Robb, J. R. Cheeseman, G. Scalmani, V. Barone, B. Mennucci, G. A. Petersson, H. Nakatsuji, M. Caricato, X. Li, H. P. Hratchian, A. F. Izmaylov, J. Bloino, G. Zheng, J. L. Sonnenberg, M. Hada, M. Ehara, K. Toyota, R. Fukuda, J. Hasegawa, M. Ishida, T. Nakajima, Y. Honda, O. Kitao, H. Nakai, T. Vreven, J. A. Montgomery, Jr., J. E. Peralta, F. Ogliaro, M. Bearpark, J. J. Heyd, E. Brothers, K. N. Kudin, V. N. Staroverov, R. Kobayashi, J. Normand, K. Raghavachari, A. Rendell, J. C. Burant, S. S. Iyengar, J. Tomasi, M. Cossi, N. Rega, J. M. Millam, M. Klene, J. E. Knox, J. B. Cross, V. Bakken, C. Adamo, J. Jaramillo, R. Gomperts, R. E. Stratmann, O. Yazyev, A. J. Austin, R. Cammi, C. Pomelli, J. W. Ochterski, R. L. Martin, K. Morokuma, V. G. Zakrzewski, G. A. Voth, P. Salvador, J. J. Dannenberg, S. Dapprich, A. D. Daniels, Ö. Farkas, J. B. Foresman, J. V. Ortiz, J. Cioslowski, and D. J. Fox, Gaussian, Inc., Wallingford CT, **2009**.

- [S8] a) C. Lee, W. Yang, and R. G. Parr, *Phys. Rev. B: Condens. Matter*, **1988**, 37, 785; b) A. D. Becke, *J. Chem. Phys.*, **1993**, 98, 5648.
- [S9] a) T. H. Dunning Jr. and P. J. Hay, in *Modern Theoretical Chemistry* (Ed. H. F. Schaefer III), Vol. 3, Plenum, New York, **1977**, 1; b) P. J. Hay and W. R. Wadt, *J. Chem. Phys.*, **1985**, 82 270; c) W. R. Wadt and P. J. Hay, *J. Chem. Phys.*, **1985**, 82, 284; d) P. J. Hay and W. R. Wadt, *J. Chem. Phys.*, **1985**, 82, 299.
- [S10] S. Grimme, J. Antony, S. Ehrlich, H. Krieg, *J. Chem. Phys.* **2010**, 132, 154104.
